# Supplementary material for: Health service utilisation during the COVID-19 pandemic in sub-Saharan Africa in 2020: a multicountry empirical assessment with a focus on maternal, newborn and child health services
Source: PubMed Central journal article supplement (PMC9062456; doi:10.1136/bmjgh-2021-008069), 2022-05-02
Supplement: bmjgh-2021-008069supp001.pdf [file bmjgh-2021-008069supp001.pdf]

## Appendix -1

## Summary of DHIS2 data quality 2017-2020 using tracer indicators (ANC, delivery, vaccination and OPD)

| Country              | Data quality metric                                                  | 2017      | 2018      | 2019      | 2020      |
|----------------------|----------------------------------------------------------------------|-----------|-----------|-----------|-----------|
| Burkina Faso         | % of expected monthly facility reports (mean, national) *            | 97        | 98        | 81        | 93        |
| Burkina Faso         | % of districts with completeness of facility reporting $\geq 90\%$ * | 90        | 93        | 53        | 79        |
| Burkina Faso         | % of districts with no missing monthly values in the year *          | 100       | 100       | 100       | 100       |
| Burkina Faso         | % of monthly values that are not extreme outliers (mean, national) * | 100       | 100       | 78        | 100       |
| Burkina Faso         | % of districts with no extreme outliers in the year *                | 100       | 100       | 46        | 95        |
| Burkina Faso         | % of districts with ANC1-penta1 ratio between 1.0 and 1.5            | 63        | 67        | 51        | 60        |
| Burkina Faso         | % of districts with penta1-penta3 ratio between 1.0 and 1.5          | 66        | 90        | 66        | 90        |
| <b>Burkina Faso</b>  | <b>Annual data quality score (mean, %)</b>                           | <b>88</b> | <b>93</b> | <b>68</b> | <b>88</b> |
| Cote d'Ivoire        | % of expected monthly facility reports (mean, national) *            | 90        | 94        | 97        | 98        |
| Cote d'Ivoire        | % of districts with completeness of facility reporting $\geq 90\%$ * | 59        | 88        | 96        | 98        |
| Cote d'Ivoire        | % of districts with no missing monthly values in the year *          | 98        | 99        | 99        | 69        |
| Cote d'Ivoire        | % of monthly values that are not extreme outliers (mean, national) * | 99        | 100       | 99        | 100       |
| Cote d'Ivoire        | % of districts with no extreme outliers in the year *                | 94        | 97        | 97        | 98        |
| Cote d'Ivoire        | % of districts with ANC1-penta1 ratio between 1.0 and 1.5            | 51        | 44        | 36        | 18        |
| Cote d'Ivoire        | % of districts with penta1-penta3 ratio between 1.0 and 1.5          | 74        | 79        | 90        | 91        |
| <b>Cote d'Ivoire</b> | <b>Annual data quality score (mean, %)</b>                           | <b>81</b> | <b>86</b> | <b>88</b> | <b>82</b> |
| Ethiopia             | % of expected monthly facility reports (mean, national) *            | -         | -         | 84        | 81        |
| Ethiopia             | % of districts with completeness of facility reporting $\geq 90\%$ * | -         | -         | 94        | 94        |
| Ethiopia             | % of districts with no missing monthly values in the year *          | -         | -         | 100       | 100       |
| Ethiopia             | % of monthly values that are not extreme outliers (mean, national) * | -         | -         | 94        | 94        |
| Ethiopia             | % of districts with no extreme outliers in the year *                | -         | -         | 92        | 84        |
| Ethiopia             | % of districts with ANC1-penta1 ratio between 1.0 and 1.5            | -         | -         | 92        | 75        |
| Ethiopia             | % of districts with penta1-penta3 ratio between 1.0 and 1.5          | -         | -         | 100       | 100       |
| <b>Ethiopia</b>      | <b>Annual data quality score (mean, %)</b>                           | <b>-</b>  | <b>-</b>  | <b>94</b> | <b>90</b> |
| Ghana                | % of expected monthly facility reports (mean, national) *            | 93        | 94        | 95        | 98        |
| Ghana                | % of districts with completeness of facility reporting $\geq 90\%$ * | 77        | 80        | 87        | 96        |
| Ghana                | % of districts with no missing monthly values in the year *          | 100       | 100       | 100       | 100       |
| Ghana                | % of monthly values that are not extreme outliers (mean, national) * | 100       | 100       | 100       | 99        |
| Ghana                | % of districts with no extreme outliers in the year *                | 97        | 97        | 97        | 94        |
| Ghana                | % of districts with ANC1-penta1 ratio between 1.0 and 1.5            | 30        | 27        | 22        | 29        |
| Ghana                | % of districts with penta1-penta3 ratio between 1.0 and 1.5          | 47        | 49        | 44        | 46        |
| <b>Ghana</b>         | <b>Annual data quality score (mean, %)</b>                           | <b>77</b> | <b>78</b> | <b>78</b> | <b>80</b> |

| Country        | Data quality metric                                                  | 2017      | 2018      | 2019      | 2020      |
|----------------|----------------------------------------------------------------------|-----------|-----------|-----------|-----------|
| Kenya          | % of expected monthly facility reports (mean, national) *            | -         | 92        | 94        | 95        |
| Kenya          | % of districts with completeness of facility reporting >= 90% *      | -         | 75        | 79        | 89        |
| Kenya          | % of districts with no missing monthly values in the year *          | -         | 100       | 100       | 100       |
| Kenya          | % of monthly values that are not extreme outliers (mean, national) * | -         | 100       | 100       | 99        |
| Kenya          | % of districts with no extreme outliers in the year *                | -         | 98        | 98        | 94        |
| Kenya          | % of districts with ANC1-penta1 ratio between 1.0 and 1.5            | -         | 70        | 70        | 96        |
| Kenya          | % of districts with penta1-penta3 ratio between 1.0 and 1.5          | -         | 91        | 94        | 91        |
| <b>Kenya</b>   | <b>Annual data quality score (mean, %)</b>                           | -         | <b>90</b> | <b>91</b> | <b>95</b> |
| Liberia        | % of expected monthly facility reports (mean, national) *            | -         | 95        | 95        | 96        |
| Liberia        | % of districts with completeness of facility reporting >= 90% *      | -         | 90        | 88        | 92        |
| Liberia        | % of districts with no missing monthly values in the year *          | -         | 100       | 100       | 100       |
| Liberia        | % of monthly values that are not extreme outliers (mean, national) * | -         | 100       | 100       | 98        |
| Liberia        | % of districts with no extreme outliers in the year *                | -         | 98        | 98        | 88        |
| Liberia        | % of districts with ANC1-penta1 ratio between 1.0 and 1.5            | -         | 27        | 67        | 67        |
| Liberia        | % of districts with penta1-penta3 ratio between 1.0 and 1.5          | -         | 93        | 100       | 100       |
| <b>Liberia</b> | <b>Annual data quality score (mean, %)</b>                           | -         | <b>86</b> | <b>93</b> | <b>92</b> |
| Mali           | % of expected monthly facility reports (mean, national) *            | 92        | 95        | 99        | 99        |
| Mali           | % of districts with completeness of facility reporting >= 90% *      | 85        | 90        | 99        | 97        |
| Mali           | % of districts with no missing monthly values in the year *          | 96        | 94        | 100       | 98        |
| Mali           | % of monthly values that are not extreme outliers (mean, national) * | 99        | 99        | 98        | 96        |
| Mali           | % of districts with no extreme outliers in the year *                | 92        | 93        | 89        | 86        |
| Mali           | % of districts with ANC1-penta1 ratio between 1.0 and 1.5            | 30        | 21        | 15        | 27        |
| Mali           | % of districts with penta1-penta3 ratio between 1.0 and 1.5          | 86        | 84        | 92        | 91        |
| <b>Mali</b>    | <b>Annual data quality score (mean, %)</b>                           | <b>83</b> | <b>82</b> | <b>85</b> | <b>85</b> |
| Niger          | % of expected monthly facility reports (mean, national) *            | 89        | 92        | 87        | 84        |
| Niger          | % of districts with completeness of facility reporting >= 90% *      | 69        | 73        | 68        | 53        |
| Niger          | % of districts with no missing monthly values in the year *          | 100       | 100       | 100       | 100       |
| Niger          | % of monthly values that are not extreme outliers (mean, national) * | 99        | 100       | 99        | 98        |
| Niger          | % of districts with no extreme outliers in the year *                | 92        | 96        | 93        | 87        |
| Niger          | % of districts with ANC1-penta1 ratio between 1.0 and 1.5            | 19        | 21        | 21        | 31        |
| Niger          | % of districts with penta1-penta3 ratio between 1.0 and 1.5          | 93        | 93        | 92        | 97        |
| <b>Niger</b>   | <b>Annual data quality score (mean, %)</b>                           | <b>80</b> | <b>82</b> | <b>80</b> | <b>79</b> |
| Nigeria        | % of expected monthly facility reports (mean, national) *            | 74        | 79        | 79        | 68        |
| Nigeria        | % of districts with completeness of facility reporting >= 90% *      | 19        | 27        | 27        | 16        |

| Country         | Data quality metric                                                  | 2017      | 2018      | 2019      | 2020      |
|-----------------|----------------------------------------------------------------------|-----------|-----------|-----------|-----------|
| Nigeria         | % of districts with no missing monthly values in the year *          | 100       | 100       | 100       | 59        |
| Nigeria         | % of monthly values that are not extreme outliers (mean, national) * | 99        | 99        | 100       | 96        |
| Nigeria         | % of districts with no extreme outliers in the year *                | 95        | 89        | 92        | 78        |
| Nigeria         | % of districts with ANC1-penta1 ratio between 1.0 and 1.5            | 19        | 27        | 22        | 5         |
| Nigeria         | % of districts with penta1-penta3 ratio between 1.0 and 1.5          | 100       | 100       | 97        | 100       |
| <b>Nigeria</b>  | <b>Annual data quality score (mean, %)</b>                           | <b>72</b> | <b>74</b> | <b>74</b> | <b>60</b> |
| Tanzania        | % of expected monthly facility reports (mean, national) *            | 96        | 97        | 97        | 98        |
| Tanzania        | % of districts with completeness of facility reporting >= 90% *      | 87        | 92        | 95        | 98        |
| Tanzania        | % of districts with no missing monthly values in the year *          | 100       | 100       | 100       | 100       |
| Tanzania        | % of monthly values that are not extreme outliers (mean, national) * | 100       | 100       | 100       | 99        |
| Tanzania        | % of districts with no extreme outliers in the year *                | 96        | 97        | 96        | 92        |
| Tanzania        | % of districts with ANC1-penta1 ratio between 1.0 and 1.5            | 88        | 90        | 78        | 76        |
| Tanzania        | % of districts with penta1-penta3 ratio between 1.0 and 1.5          | 89        | 94        | 86        | 89        |
| <b>Tanzania</b> | <b>Annual data quality score (mean, %)</b>                           | <b>94</b> | <b>96</b> | <b>93</b> | <b>93</b> |
| Uganda          | % of expected monthly facility reports (mean, national) *            | 88        | 89        | 89        | 84        |
| Uganda          | % of districts with completeness of facility reporting >= 90% *      | 59        | 61        | 62        | 74        |
| Uganda          | % of districts with no missing monthly values in the year *          | 100       | 100       | 100       | 100       |
| Uganda          | % of monthly values that are not extreme outliers (mean, national) * | 99        | 100       | 100       | 99        |
| Uganda          | % of districts with no extreme outliers in the year *                | 95        | 97        | 98        | 92        |
| Uganda          | % of districts with ANC1-penta1 ratio between 1.0 and 1.5            | 58        | 68        | 60        | 78        |
| Uganda          | % of districts with penta1-penta3 ratio between 1.0 and 1.5          | 94        | 88        | 91        | 88        |
| <b>Uganda</b>   | <b>Annual data quality score (mean, %)</b>                           | <b>85</b> | <b>86</b> | <b>86</b> | <b>88</b> |
| Zambia          | % of expected monthly facility reports (mean, national) *            | 95        | 96        | 93        | 96        |
| Zambia          | % of districts with completeness of facility reporting >= 90% *      | 100       | 98        | 75        | 87        |
| Zambia          | % of districts with no missing monthly values in the year *          | 100       | 100       | 99        | 100       |
| Zambia          | % of monthly values that are not extreme outliers (mean, national) * | 100       | 100       | 100       | 99        |
| Zambia          | % of districts with no extreme outliers in the year *                | 99        | 97        | 98        | 94        |
| Zambia          | % of districts with ANC1-penta1 ratio between 1.0 and 1.5            | 78        | 92        | 89        | 91        |
| Zambia          | % of districts with penta1-penta3 ratio between 1.0 and 1.5          | 83        | 83        | 87        | 79        |
| <b>Zambia</b>   | <b>Annual data quality score (mean, %)</b>                           | <b>94</b> | <b>95</b> | <b>92</b> | <b>92</b> |

\*Mean for ANC, delivery, immunization and OPD services



## COTE D'IVOIRE

| Indicator         | Month/Period              | National     |              |              | Urban       |             |             | Mixed urban-rural |              |              |
|-------------------|---------------------------|--------------|--------------|--------------|-------------|-------------|-------------|-------------------|--------------|--------------|
|                   |                           | %change      | Lower bound  | Upper bound  | %change     | Lower bound | Upper bound | %change           | Lower bound  | Upper bound  |
| ANC1              | Mar 2020                  | -5.8         | -11.1        | -0.6         | -2.0        | -3.9        | -0.2        | -7.1              | -13.5        | -0.7         |
| ANC1              | Apr 2020                  | 10.5         | 5.1          | 15.9         | 3.7         | 1.8         | 5.5         | 12.8              | 6.2          | 19.4         |
| ANC1              | May 2020                  | -5.5         | -10.8        | -0.2         | -1.9        | -3.8        | -0.1        | -6.7              | -13.1        | -0.3         |
| ANC1              | Jun 2020                  | 7.5          | 2.2          | 12.8         | 2.6         | 0.7         | 4.5         | 9.1               | 2.6          | 15.6         |
| ANC1              | Jul 2020                  | -7.6         | -12.9        | -2.3         | -2.6        | -4.5        | -0.8        | -9.2              | -15.7        | -2.7         |
| ANC1              | Aug 2020                  | -4.3         | -9.6         | 1.0          | -1.5        | -3.3        | 0.3         | -5.2              | -11.6        | 1.2          |
| ANC1              | Sep 2020                  | 6.7          | 1.4          | 12.1         | 2.3         | 0.5         | 4.2         | 8.2               | 1.7          | 14.7         |
| ANC1              | Oct 2020                  | -2.9         | -8.2         | 2.4          | -1.0        | -2.9        | 0.8         | -3.6              | -10.0        | 2.9          |
| ANC1              | Nov 2020                  | 3.9          | -1.4         | 9.2          | 1.3         | -0.5        | 3.2         | 4.7               | -1.8         | 11.1         |
| ANC1              | Dec 2020                  | 1.5          | -3.8         | 6.8          | 0.5         | -1.3        | 2.4         | 1.8               | -4.6         | 8.2          |
| <b>ANC1</b>       | <b>Total Covid Period</b> | <b>0.4</b>   | <b>-2.0</b>  | <b>2.7</b>   | <b>0.1</b>  | <b>-0.7</b> | <b>1.0</b>  | <b>0.5</b>        | <b>-2.4</b>  | <b>3.3</b>   |
| ANC4              | Mar 2020                  | -10.3        | -14.6        | -5.9         | -4.1        | -5.8        | -2.3        | -12.0             | -17.1        | -6.8         |
| ANC4              | Apr 2020                  | -4.1         | -8.4         | 0.2          | -1.6        | -3.3        | 0.1         | -4.8              | -9.8         | 0.2          |
| ANC4              | May 2020                  | -7.9         | -12.2        | -3.6         | -3.1        | -4.9        | -1.4        | -9.2              | -14.3        | -4.1         |
| ANC4              | Jun 2020                  | -1.8         | -6.1         | 2.5          | -0.7        | -2.4        | 1.0         | -2.1              | -7.1         | 2.9          |
| ANC4              | Jul 2020                  | -4.6         | -9.0         | -0.3         | -1.8        | -3.5        | -0.1        | -5.4              | -10.5        | -0.4         |
| ANC4              | Aug 2020                  | -5.6         | -10.0        | -1.3         | -2.2        | -3.9        | -0.5        | -6.6              | -11.7        | -1.5         |
| ANC4              | Sep 2020                  | 2.8          | -1.5         | 7.1          | 1.1         | -0.6        | 2.8         | 3.3               | -1.8         | 8.4          |
| ANC4              | Oct 2020                  | -3.5         | -7.8         | 0.8          | -1.4        | -3.1        | 0.3         | -4.1              | -9.1         | 1.0          |
| ANC4              | Nov 2020                  | -1.5         | -5.8         | 2.8          | -0.6        | -2.3        | 1.1         | -1.7              | -6.8         | 3.3          |
| ANC4              | Dec 2020                  | 1.2          | -3.1         | 5.5          | 0.5         | -1.2        | 2.2         | 1.4               | -3.6         | 6.5          |
| <b>ANC4</b>       | <b>Total Covid Period</b> | <b>-3.6</b>  | <b>-5.5</b>  | <b>-1.6</b>  | <b>-1.4</b> | <b>-2.2</b> | <b>-0.6</b> | <b>-4.2</b>       | <b>-6.4</b>  | <b>-1.9</b>  |
| Deliveries        | Mar 2020                  | -2.5         | -6.2         | 1.3          | -1.2        | -2.9        | 0.6         | -2.8              | -7.0         | 1.5          |
| Deliveries        | Apr 2020                  | 0.5          | -3.2         | 4.3          | 0.3         | -1.5        | 2.0         | 0.6               | -3.6         | 4.8          |
| Deliveries        | May 2020                  | -4.3         | -8.1         | -0.5         | -2.0        | -3.8        | -0.2        | -4.8              | -9.1         | -0.6         |
| Deliveries        | Jun 2020                  | -6.0         | -9.8         | -2.2         | -2.8        | -4.7        | -1.0        | -6.8              | -11.0        | -2.5         |
| Deliveries        | Jul 2020                  | 1.0          | -2.7         | 4.8          | 0.5         | -1.3        | 2.3         | 1.2               | -3.1         | 5.4          |
| Deliveries        | Aug 2020                  | -4.5         | -8.3         | -0.7         | -2.1        | -3.9        | -0.3        | -5.1              | -9.3         | -0.8         |
| Deliveries        | Sep 2020                  | -1.5         | -5.3         | 2.2          | -0.7        | -2.5        | 1.1         | -1.7              | -5.9         | 2.5          |
| Deliveries        | Oct 2020                  | -0.3         | -4.1         | 3.5          | -0.2        | -1.9        | 1.6         | -0.4              | -4.6         | 3.9          |
| Deliveries        | Nov 2020                  | 2.1          | -1.6         | 5.9          | 1.0         | -0.8        | 2.8         | 2.4               | -1.8         | 6.7          |
| Deliveries        | Dec 2020                  | -5.1         | -8.9         | -1.3         | -2.4        | -4.2        | -0.6        | -5.7              | -10.0        | -1.4         |
| <b>Deliveries</b> | <b>Total Covid Period</b> | <b>-2.1</b>  | <b>-3.7</b>  | <b>-0.4</b>  | <b>-1.0</b> | <b>-1.8</b> | <b>-0.2</b> | <b>-2.3</b>       | <b>-4.2</b>  | <b>-0.4</b>  |
| C-section         | Mar 2020                  | -1.2         | -12.0        | 9.6          | -0.4        | -3.9        | 3.1         | -1.5              | -14.9        | 12.0         |
| C-section         | Apr 2020                  | -11.4        | -22.8        | 0.0          | -3.7        | -7.4        | 0.0         | -14.1             | -28.7        | 0.4          |
| C-section         | May 2020                  | -6.8         | -17.8        | 4.2          | -2.2        | -5.7        | 1.4         | -8.4              | -22.2        | 5.4          |
| C-section         | Jun 2020                  | -6.4         | -17.4        | 4.6          | -2.1        | -5.6        | 1.5         | -7.9              | -21.7        | 5.9          |
| C-section         | Jul 2020                  | -7.4         | -18.4        | 3.7          | -2.4        | -6.0        | 1.2         | -9.1              | -23.1        | 4.8          |
| C-section         | Aug 2020                  | 0.9          | -9.9         | 11.8         | 0.3         | -3.2        | 3.8         | 1.2               | -12.3        | 14.6         |
| C-section         | Sep 2020                  | -8.0         | -19.1        | 3.1          | -2.6        | -6.2        | 1.0         | -9.9              | -24.0        | 4.1          |
| C-section         | Oct 2020                  | -3.3         | -14.2        | 7.6          | -1.1        | -4.6        | 2.4         | -4.1              | -17.7        | 9.5          |
| C-section         | Nov 2020                  | 0.7          | -10.2        | 11.6         | 0.2         | -3.3        | 3.7         | 0.9               | -12.7        | 14.4         |
| C-section         | Dec 2020                  | -6.8         | -17.9        | 4.3          | -2.2        | -5.8        | 1.4         | -8.4              | -22.4        | 5.5          |
| <b>C-section</b>  | <b>Total Covid Period</b> | <b>-4.9</b>  | <b>-10.0</b> | <b>0.1</b>   | <b>-1.6</b> | <b>-3.3</b> | <b>0.1</b>  | <b>-6.1</b>       | <b>-12.6</b> | <b>0.3</b>   |
| OPD               | Mar 2020                  | -20.0        | -24.0        | -16.0        | -9.3        | -11.4       | -7.2        | -22.5             | -27.1        | -17.9        |
| OPD               | Apr 2020                  | -7.0         | -10.6        | -3.3         | -3.2        | -5.0        | -1.5        | -7.8              | -12.0        | -3.7         |
| OPD               | May 2020                  | -13.8        | -17.6        | -9.9         | -6.4        | -8.3        | -4.5        | -15.4             | -19.8        | -11.1        |
| OPD               | Jun 2020                  | -18.3        | -22.2        | -14.3        | -8.5        | -10.5       | -6.4        | -20.5             | -25.0        | -15.9        |
| OPD               | Jul 2020                  | -10.9        | -14.7        | -7.2         | -5.1        | -6.9        | -3.3        | -12.3             | -16.5        | -8.0         |
| OPD               | Aug 2020                  | -26.6        | -30.8        | -22.3        | -12.3       | -14.7       | -10.0       | -29.8             | -34.8        | -24.8        |
| OPD               | Sep 2020                  | -4.7         | -8.4         | -1.1         | -2.2        | -3.9        | -0.5        | -5.3              | -9.5         | -1.2         |
| OPD               | Oct 2020                  | -6.8         | -10.5        | -3.1         | -3.1        | -4.9        | -1.4        | -7.6              | -11.8        | -3.5         |
| OPD               | Nov 2020                  | -7.9         | -11.6        | -4.2         | -3.7        | -5.4        | -1.9        | -8.9              | -13.0        | -4.7         |
| OPD               | Dec 2020                  | -10.4        | -14.1        | -6.6         | -4.8        | -6.6        | -3.0        | -11.6             | -15.9        | -7.4         |
| <b>OPD</b>        | <b>Total Covid Period</b> | <b>-12.4</b> | <b>-14.2</b> | <b>-10.5</b> | <b>-5.8</b> | <b>-6.9</b> | <b>-4.8</b> | <b>-13.8</b>      | <b>-16.0</b> | <b>-11.6</b> |
| IPD               | Mar 2020                  | -9.7         | -20.1        | 0.7          | -7.2        | -15.7       | 1.3         | -10.0             | -20.7        | 0.8          |
| IPD               | Apr 2020                  | 6.2          | -4.1         | 16.6         | 4.6         | -3.4        | 12.6        | 6.4               | -4.3         | 17.1         |
| IPD               | May 2020                  | -7.1         | -17.5        | 3.2          | -5.3        | -13.4       | 2.8         | -7.4              | -18.0        | 3.3          |
| IPD               | Jun 2020                  | -5.7         | -16.0        | 4.6          | -4.2        | -12.2       | 3.7         | -5.9              | -16.5        | 4.7          |
| IPD               | Jul 2020                  | -0.9         | -11.2        | 9.3          | -0.7        | -8.3        | 6.9         | -0.9              | -11.5        | 9.6          |
| IPD               | Aug 2020                  | -17.7        | -28.6        | -6.8         | -13.2       | -23.6       | -2.7        | -18.3             | -29.6        | -6.9         |
| IPD               | Sep 2020                  | 3.5          | -6.8         | 13.9         | 2.6         | -5.1        | 10.4        | 3.7               | -7.0         | 14.3         |
| IPD               | Oct 2020                  | 2.6          | -7.7         | 12.9         | 1.9         | -5.8        | 9.6         | 2.6               | -8.0         | 13.3         |
| IPD               | Nov 2020                  | 3.7          | -6.6         | 14.0         | 2.7         | -5.0        | 10.5        | 3.8               | -6.9         | 14.5         |
| IPD               | Dec 2020                  | -2.4         | -12.7        | 7.9          | -1.8        | -9.5        | 5.9         | -2.5              | -13.1        | 8.2          |
| <b>IPD</b>        | <b>Total Covid Period</b> | <b>-2.8</b>  | <b>-7.4</b>  | <b>1.8</b>   | <b>-2.1</b> | <b>-5.6</b> | <b>1.5</b>  | <b>-2.9</b>       | <b>-7.6</b>  | <b>1.8</b>   |

|                            |                           | ETHIOPIA     |              |              |                        |              |              |                  |              |              |
|----------------------------|---------------------------|--------------|--------------|--------------|------------------------|--------------|--------------|------------------|--------------|--------------|
| indicator                  | Month/period              | National     |              |              | Ethiopia without Addis |              |              | Addis Ababa Only |              |              |
|                            |                           | Drop (%)     | lb_drop      | ub_drop      | Drop (%)               | lb_drop      | ub_drop      | Drop (%)         | lb_drop      | ub_drop      |
| ANC1                       | Mar-20                    | -13.0        | -24.3        | -1.7         | -12.5                  | -23.3        | -1.7         | -24.9            | -46.5        | -3.3         |
| ANC1                       | Apr-20                    | -17.2        | -28.5        | -6.0         | -16.5                  | -27.3        | -5.7         | -32.9            | -54.4        | -11.4        |
| ANC1                       | May-20                    | -1.1         | -12.5        | 10.3         | -1.0                   | -12.0        | 9.9          | -2.1             | -24.0        | 19.9         |
| ANC1                       | Jun-20                    | -2.4         | -13.8        | 9.0          | -2.3                   | -13.2        | 8.6          | -4.6             | -26.5        | 17.3         |
| ANC1                       | Jul-20                    | -9.2         | -20.5        | 2.1          | -8.8                   | -19.7        | 2.0          | -17.6            | -39.3        | 4.0          |
| ANC1                       | Aug-20                    | -3.5         | -14.8        | 7.9          | -3.3                   | -14.2        | 7.6          | -6.6             | -28.5        | 15.2         |
| ANC1                       | Sep-20                    | -4.5         | -15.9        | 6.8          | -4.3                   | -15.2        | 6.6          | -8.7             | -30.5        | 13.1         |
| <b>ANC1</b>                | <b>Total Covid Period</b> | <b>-7.1</b>  | <b>-14.2</b> | <b>-0.1</b>  | <b>-6.8</b>            | <b>-13.6</b> | <b>-0.1</b>  | <b>-13.4</b>     | <b>-26.5</b> | <b>-0.4</b>  |
| ANC4                       | Mar-20                    | -5.5         | -13.5        | 2.5          | -5.4                   | -13.1        | 2.4          | -8.7             | -21.2        | 3.9          |
| ANC4                       | Apr-20                    | -10.9        | -18.8        | -2.9         | -10.5                  | -18.2        | -2.8         | -17.0            | -29.5        | -4.5         |
| ANC4                       | May-20                    | -3.6         | -11.7        | 4.4          | -3.5                   | -11.3        | 4.3          | -5.7             | -18.3        | 6.9          |
| ANC4                       | Jun-20                    | -4.7         | -12.8        | 3.3          | -4.6                   | -12.4        | 3.2          | -7.4             | -20.0        | 5.1          |
| ANC4                       | Jul-20                    | -5.2         | -13.2        | 2.8          | -5.0                   | -12.8        | 2.7          | -8.2             | -20.7        | 4.4          |
| ANC4                       | Aug-20                    | -2.1         | -10.1        | 5.9          | -2.0                   | -9.8         | 5.7          | -3.3             | -15.9        | 9.3          |
| ANC4                       | Sep-20                    | -1.8         | -9.8         | 6.2          | -1.7                   | -9.5         | 6.0          | -2.8             | -15.4        | 9.8          |
| <b>ANC4</b>                | <b>Total Covid Period</b> | <b>-4.8</b>  | <b>-9.8</b>  | <b>0.2</b>   | <b>-4.6</b>            | <b>-9.5</b>  | <b>0.2</b>   | <b>-7.4</b>      | <b>-15.1</b> | <b>0.3</b>   |
| Deliveries                 | Mar-20                    | 0.8          | -4.9         | 6.4          | 0.8                    | -4.8         | 6.3          | 1.0              | -6.3         | 8.3          |
| Deliveries                 | Apr-20                    | -3.3         | -8.9         | 2.3          | -3.3                   | -8.8         | 2.2          | -4.3             | -11.6        | 2.9          |
| Deliveries                 | May-20                    | 0.6          | -5.0         | 6.2          | 0.6                    | -4.9         | 6.1          | 0.8              | -6.5         | 8.1          |
| Deliveries                 | Jun-20                    | 2.2          | -3.4         | 7.9          | 2.2                    | -3.3         | 7.7          | 2.9              | -4.4         | 10.2         |
| Deliveries                 | Jul-20                    | -1.3         | -6.9         | 4.3          | -1.3                   | -6.8         | 4.2          | -1.7             | -9.0         | 5.6          |
| Deliveries                 | Aug-20                    | -0.5         | -6.1         | 5.2          | -0.5                   | -6.0         | 5.0          | -0.6             | -7.9         | 6.7          |
| Deliveries                 | Sep-20                    | -8.2         | -13.8        | -2.7         | -8.1                   | -13.5        | -2.6         | -10.7            | -17.9        | -3.4         |
| <b>Deliveries</b>          | <b>Total Covid Period</b> | <b>-1.4</b>  | <b>-5.0</b>  | <b>2.2</b>   | <b>-1.4</b>            | <b>-4.9</b>  | <b>2.2</b>   | <b>-1.8</b>      | <b>-6.5</b>  | <b>2.9</b>   |
| Penta1                     | Mar-20                    | -11.4        | -18.6        | -4.2         | -10.9                  | -17.8        | -4.0         | -22.3            | -36.5        | -8.0         |
| Penta1                     | Apr-20                    | -7.7         | -14.9        | -0.4         | -7.4                   | -14.3        | -0.4         | -15.0            | -29.3        | -0.8         |
| Penta1                     | May-20                    | 1.8          | -5.5         | 9.1          | 1.7                    | -5.3         | 8.7          | 3.6              | -10.8        | 18.0         |
| Penta1                     | Jun-20                    | -2.7         | -9.9         | 4.6          | -2.5                   | -9.5         | 4.4          | -5.2             | -19.5        | 9.1          |
| Penta1                     | Jul-20                    | -3.2         | -10.5        | 4.0          | -3.1                   | -10.1        | 3.9          | -6.4             | -20.6        | 7.9          |
| Penta1                     | Aug-20                    | -2.0         | -9.3         | 5.3          | -1.9                   | -8.9         | 5.0          | -4.0             | -18.3        | 10.3         |
| Penta1                     | Sep-20                    | -6.5         | -13.7        | 0.8          | -6.2                   | -13.2        | 0.8          | -12.7            | -26.9        | 1.6          |
| <b>Penta1</b>              | <b>Total Covid Period</b> | <b>-4.5</b>  | <b>-9.1</b>  | <b>0.2</b>   | <b>-4.3</b>            | <b>-8.7</b>  | <b>0.1</b>   | <b>-8.7</b>      | <b>-17.5</b> | <b>0.2</b>   |
| Penta3                     | Mar-20                    | -7.7         | -15.0        | -0.3         | -7.4                   | -14.4        | -0.3         | -14.1            | -27.8        | -0.5         |
| Penta3                     | Apr-20                    | -10.0        | -17.4        | -2.6         | -9.6                   | -16.7        | -2.5         | -18.4            | -32.1        | -4.8         |
| Penta3                     | May-20                    | -3.1         | -10.5        | 4.3          | -3.0                   | -10.1        | 4.1          | -5.7             | -19.4        | 7.9          |
| Penta3                     | Jun-20                    | -3.1         | -10.5        | 4.3          | -2.9                   | -10.1        | 4.2          | -5.7             | -19.3        | 8.0          |
| Penta3                     | Jul-20                    | -2.5         | -9.9         | 4.9          | -2.4                   | -9.5         | 4.7          | -4.6             | -18.3        | 9.0          |
| Penta3                     | Aug-20                    | -1.1         | -8.5         | 6.3          | -1.1                   | -8.2         | 6.1          | -2.1             | -15.8        | 11.7         |
| Penta3                     | Sep-20                    | -3.9         | -11.3        | 3.5          | -3.8                   | -10.9        | 3.4          | -7.2             | -20.9        | 6.4          |
| <b>Penta3</b>              | <b>Total Covid Period</b> | <b>-4.4</b>  | <b>-9.1</b>  | <b>0.2</b>   | <b>-4.3</b>            | <b>-8.7</b>  | <b>0.2</b>   | <b>-8.1</b>      | <b>-16.5</b> | <b>0.3</b>   |
| C-section                  | Mar-20                    | 7.2          | -3.5         | 18.0         | 8.9                    | -4.3         | 22.1         | 2.4              | -1.1         | 5.9          |
| C-section                  | Apr-20                    | 3.0          | -7.7         | 13.7         | 3.7                    | -9.4         | 16.8         | 1.0              | -2.5         | 4.5          |
| C-section                  | May-20                    | 4.5          | -6.2         | 15.2         | 5.5                    | -7.6         | 18.6         | 1.5              | -2.0         | 5.0          |
| C-section                  | Jun-20                    | 10.6         | -0.2         | 21.4         | 13.0                   | -0.2         | 26.3         | 3.5              | 0.0          | 7.0          |
| C-section                  | Jul-20                    | 4.7          | -6.0         | 15.4         | 5.7                    | -7.4         | 18.9         | 1.5              | -2.0         | 5.0          |
| C-section                  | Aug-20                    | -5.9         | -16.5        | 4.7          | -7.3                   | -20.3        | 5.7          | -2.0             | -5.4         | 1.5          |
| C-section                  | Sep-20                    | 2.1          | -8.5         | 12.8         | 2.6                    | -10.5        | 15.7         | 0.7              | -2.8         | 4.2          |
| <b>C-section</b>           | <b>Total Covid Period</b> | <b>3.8</b>   | <b>-3.3</b>  | <b>10.8</b>  | <b>4.6</b>             | <b>-4.1</b>  | <b>13.3</b>  | <b>1.2</b>       | <b>-1.0</b>  | <b>3.5</b>   |
| Measles vaccination        | Mar-20                    | -14.8        | -26.4        | -3.2         | -14.2                  | -25.3        | -3.0         | -28.0            | -50.1        | -5.9         |
| Measles vaccination        | Apr-20                    | -8.0         | -19.7        | 3.7          | -7.7                   | -18.9        | 3.5          | -15.3            | -37.5        | 7.0          |
| Measles vaccination        | May-20                    | 6.2          | -5.7         | 18.1         | 5.9                    | -5.4         | 17.3         | 11.9             | -10.9        | 34.7         |
| Measles vaccination        | Jun-20                    | -0.2         | -12.0        | 11.6         | -0.2                   | -11.5        | 11.1         | -0.3             | -22.8        | 22.2         |
| Measles vaccination        | Jul-20                    | -5.9         | -17.6        | 5.8          | -5.7                   | -16.9        | 5.6          | -11.2            | -33.5        | 11.1         |
| Measles vaccination        | Aug-20                    | 2.5          | -9.3         | 14.4         | 2.4                    | -8.9         | 13.8         | 4.8              | -17.8        | 27.5         |
| Measles vaccination        | Sep-20                    | -2.4         | -14.2        | 9.4          | -2.3                   | -13.6        | 9.0          | -4.6             | -27.0        | 17.8         |
| <b>Measles vaccination</b> | <b>Total Covid Period</b> | <b>-3.2</b>  | <b>-10.7</b> | <b>4.3</b>   | <b>-3.1</b>            | <b>-10.3</b> | <b>4.1</b>   | <b>-6.1</b>      | <b>-20.1</b> | <b>8.0</b>   |
| OPD                        | Mar-20                    | -13.6        | -25.7        | -1.6         | -13.6                  | -25.7        | -1.6         | -13.5            | -25.6        | -1.5         |
| OPD                        | Apr-20                    | -32.6        | -44.6        | -20.6        | -32.6                  | -44.6        | -20.6        | -32.4            | -44.7        | -20.1        |
| OPD                        | May-20                    | -26.7        | -38.7        | -14.7        | -26.7                  | -38.7        | -14.8        | -26.6            | -38.8        | -14.4        |
| OPD                        | Jun-20                    | -19.9        | -31.9        | -7.9         | -19.9                  | -31.9        | -7.9         | -19.8            | -31.9        | -7.7         |
| OPD                        | Jul-20                    | -25.9        | -37.9        | -14.0        | -26.0                  | -37.9        | -14.0        | -25.8            | -38.0        | -13.6        |
| OPD                        | Aug-20                    | -26.2        | -38.2        | -14.2        | -26.2                  | -38.2        | -14.2        | -26.0            | -38.2        | -13.9        |
| OPD                        | Sep-20                    | -25.9        | -37.8        | -13.9        | -25.9                  | -37.9        | -13.9        | -25.7            | -37.9        | -13.5        |
| <b>OPD</b>                 | <b>Total Covid Period</b> | <b>-22.8</b> | <b>-29.7</b> | <b>-16.0</b> | <b>-22.8</b>           | <b>-29.7</b> | <b>-16.0</b> | <b>-22.7</b>     | <b>-29.9</b> | <b>-15.6</b> |
| IPD                        | Mar-20                    | -17.4        | -34.5        | -0.2         | -18.0                  | -35.8        | -0.2         | -12.4            | -24.6        | -0.1         |
| IPD                        | Apr-20                    | -38.4        | -55.2        | -21.6        | -39.8                  | -57.2        | -22.4        | -27.4            | -39.5        | -15.3        |
| IPD                        | May-20                    | -17.6        | -34.7        | -0.5         | -18.3                  | -36.0        | -0.5         | -12.5            | -24.8        | -0.3         |
| IPD                        | Jun-20                    | -28.9        | -45.9        | -12.0        | -30.0                  | -47.6        | -12.5        | -20.7            | -32.8        | -8.5         |
| IPD                        | Jul-20                    | -24.8        | -41.8        | -7.8         | -25.8                  | -43.4        | -8.1         | -17.7            | -29.9        | -5.5         |
| IPD                        | Aug-20                    | -31.2        | -48.1        | -14.3        | -32.4                  | -49.9        | -14.9        | -22.3            | -34.4        | -10.1        |
| IPD                        | Sep-20                    | -31.2        | -48.1        | -14.3        | -32.4                  | -49.9        | -14.8        | -22.3            | -34.4        | -10.1        |
| <b>IPD</b>                 | <b>Total Covid Period</b> | <b>-25.1</b> | <b>-34.6</b> | <b>-15.7</b> | <b>-26.0</b>           | <b>-35.7</b> | <b>-16.3</b> | <b>-18.3</b>     | <b>-25.4</b> | <b>-11.2</b> |







| Indicator                  | Month/Period              | National    |              |             | Rural        |              |             | Urban       |             |             |
|----------------------------|---------------------------|-------------|--------------|-------------|--------------|--------------|-------------|-------------|-------------|-------------|
|                            |                           | %change     | Lower bound  | Upper bound | %change      | Lower bound  | Upper bound | %change     | Lower bound | Upper bound |
| ANC1                       | Mar 2020                  | -14.7       | -28.1        | -1.2        | -21.3        | -43.3        | 0.8         | -4.9        | -9.3        | -0.5        |
| ANC1                       | Apr 2020                  | -19.8       | -34.3        | -5.3        | -28.7        | -53.8        | -3.6        | -6.6        | -11.2       | -1.9        |
| ANC1                       | May 2020                  | -8.9        | -21.5        | 3.7         | -12.9        | -32.3        | 6.4         | -2.9        | -7.1        | 1.2         |
| ANC1                       | Jun 2020                  | 9.2         | -3.6         | 22.0        | 13.3         | -6.4         | 33.1        | 3.0         | -1.1        | 7.2         |
| ANC1                       | Jul 2020                  | -6.7        | -19.2        | 5.7         | -9.8         | -28.4        | 8.8         | -2.2        | -6.3        | 1.9         |
| ANC1                       | Aug 2020                  | -1.2        | -13.4        | 10.9        | -1.8         | -19.4        | 15.9        | -0.4        | -4.4        | 3.6         |
| ANC1                       | Sep 2020                  | -2.8        | -15.0        | 9.3         | -4.1         | -21.9        | 13.7        | -0.9        | -5.0        | 3.1         |
| ANC1                       | Oct 2020                  | -17.0       | -30.9        | -3.1        | -24.6        | -48.0        | -1.2        | -5.6        | -10.1       | -1.1        |
| ANC1                       | Nov 2020                  | -1.9        | -14.1        | 10.2        | -2.8         | -20.5        | 14.9        | -0.6        | -4.7        | 3.4         |
| ANC1                       | Dec 2020                  | 9.3         | -3.5         | 22.1        | 13.6         | -6.2         | 33.3        | 3.1         | -1.1        | 7.3         |
| <b>ANC1</b>                | <b>Total Covid Period</b> | <b>-5.4</b> | <b>-11.6</b> | <b>0.8</b>  | <b>-7.8</b>  | <b>-17.4</b> | <b>1.8</b>  | <b>-1.8</b> | <b>-3.9</b> | <b>0.3</b>  |
| ANC4                       | Mar 2020                  | -7.9        | -21.7        | 5.9         | -10.1        | -28.1        | 7.9         | -3.3        | -9.0        | 2.5         |
| ANC4                       | Apr 2020                  | -20.8       | -36.3        | -5.2        | -26.5        | -48.4        | -4.6        | -8.6        | -15.3       | -2.0        |
| ANC4                       | May 2020                  | -10.8       | -24.9        | 3.3         | -13.8        | -32.4        | 4.9         | -4.5        | -10.4       | 1.4         |
| ANC4                       | Jun 2020                  | 7.6         | -6.3         | 21.6        | 9.8          | -8.4         | 27.9        | 3.2         | -2.6        | 8.9         |
| ANC4                       | Jul 2020                  | 5.7         | -8.1         | 19.5        | 7.3          | -10.5        | 25.1        | 2.3         | -3.4        | 8.1         |
| ANC4                       | Aug 2020                  | -3.4        | -17.0        | 10.2        | -4.4         | -21.8        | 13.1        | -1.4        | -7.1        | 4.2         |
| ANC4                       | Sep 2020                  | -5.5        | -19.2        | 8.2         | -7.1         | -24.7        | 10.6        | -2.3        | -8.0        | 3.4         |
| ANC4                       | Oct 2020                  | -21.6       | -37.3        | -5.9        | -27.5        | -49.8        | -5.3        | -9.0        | -15.7       | -2.3        |
| ANC4                       | Nov 2020                  | -5.1        | -18.8        | 8.6         | -6.5         | -24.1        | 11.1        | -2.1        | -7.8        | 3.6         |
| ANC4                       | Dec 2020                  | -1.4        | -15.0        | 12.1        | -1.8         | -19.2        | 15.5        | -0.6        | -6.2        | 5.0         |
| <b>ANC4</b>                | <b>Total Covid Period</b> | <b>-6.2</b> | <b>-13.0</b> | <b>0.6</b>  | <b>-7.9</b>  | <b>-17.0</b> | <b>1.1</b>  | <b>-2.6</b> | <b>-5.5</b> | <b>0.3</b>  |
| Deliveries                 | Mar 2020                  | 1.9         | -7.0         | 10.7        | 2.1          | -8.0         | 12.2        | 1.0         | -3.9        | 5.9         |
| Deliveries                 | Apr 2020                  | -9.0        | -18.0        | 0.0         | -10.3        | -20.7        | 0.2         | -5.0        | -10.1       | 0.2         |
| Deliveries                 | May 2020                  | -4.1        | -13.0        | 4.7         | -4.7         | -14.9        | 5.4         | -2.3        | -7.2        | 2.7         |
| Deliveries                 | Jun 2020                  | 3.2         | -5.7         | 12.1        | 3.7          | -6.5         | 13.9        | 1.8         | -3.1        | 6.7         |
| Deliveries                 | Jul 2020                  | -4.9        | -13.8        | 4.0         | -5.6         | -15.8        | 4.6         | -2.7        | -7.7        | 2.2         |
| Deliveries                 | Aug 2020                  | -2.4        | -11.2        | 6.5         | -2.7         | -12.8        | 7.4         | -1.3        | -6.2        | 3.6         |
| Deliveries                 | Sep 2020                  | -3.7        | -12.5        | 5.2         | -4.2         | -14.3        | 6.0         | -2.0        | -7.0        | 2.9         |
| Deliveries                 | Oct 2020                  | -9.6        | -18.7        | -0.6        | -11.0        | -21.4        | -0.5        | -5.3        | -10.5       | -0.1        |
| Deliveries                 | Nov 2020                  | -7.3        | -16.3        | 1.6         | -8.4         | -18.7        | 2.0         | -4.0        | -9.1        | 1.0         |
| Deliveries                 | Dec 2020                  | -13.0       | -22.2        | -3.7        | -14.8        | -25.6        | -4.0        | -7.2        | -12.6       | -1.8        |
| <b>Deliveries</b>          | <b>Total Covid Period</b> | <b>-4.8</b> | <b>-9.1</b>  | <b>-0.5</b> | <b>-5.5</b>  | <b>-10.5</b> | <b>-0.5</b> | <b>-2.7</b> | <b>-5.2</b> | <b>-0.2</b> |
| Penta1                     | Mar 2020                  | -3.6        | -14.9        | 7.7         | -5.1         | -21.3        | 11.1        | -1.2        | -5.1        | 2.6         |
| Penta1                     | Apr 2020                  | -26.3       | -41.0        | -11.5       | -37.3        | -63.5        | -11.0       | -9.0        | -13.9       | -4.1        |
| Penta1                     | May 2020                  | 6.2         | -5.2         | 17.7        | 8.9          | -7.9         | 25.7        | 2.1         | -1.8        | 6.0         |
| Penta1                     | Jun 2020                  | 4.8         | -6.6         | 16.2        | 6.8          | -9.7         | 23.3        | 1.6         | -2.2        | 5.5         |
| Penta1                     | Jul 2020                  | 2.6         | -8.7         | 13.9        | 3.7          | -12.4        | 19.8        | 0.9         | -3.0        | 4.7         |
| Penta1                     | Aug 2020                  | 5.4         | -6.0         | 16.8        | 7.7          | -8.9         | 24.3        | 1.8         | -2.0        | 5.7         |
| Penta1                     | Sep 2020                  | 28.1        | 12.5         | 43.6        | 40.1         | 11.7         | 68.5        | 9.5         | 4.5         | 14.5        |
| Penta1                     | Oct 2020                  | -1.4        | -12.6        | 9.8         | -2.0         | -18.0        | 14.0        | -0.5        | -4.3        | 3.3         |
| Penta1                     | Nov 2020                  | 20.9        | 7.1          | 34.7        | 29.8         | 6.2          | 53.4        | 7.1         | 2.6         | 11.6        |
| Penta1                     | Dec 2020                  | -4.4        | -15.7        | 6.9         | -6.3         | -22.6        | 10.0        | -1.5        | -5.4        | 2.3         |
| <b>Penta1</b>              | <b>Total Covid Period</b> | <b>3.2</b>  | <b>-2.7</b>  | <b>9.1</b>  | <b>4.6</b>   | <b>-4.2</b>  | <b>13.3</b> | <b>1.1</b>  | <b>-0.9</b> | <b>3.1</b>  |
| Penta3                     | Mar 2020                  | -2.0        | -13.6        | 9.6         | -2.8         | -19.3        | 13.7        | -0.7        | -4.6        | 3.3         |
| Penta3                     | Apr 2020                  | -29.4       | -45.4        | -13.4       | -41.7        | -70.7        | -12.7       | -10.1       | -15.4       | -4.8        |
| Penta3                     | May 2020                  | 3.4         | -8.3         | 15.1        | 4.8          | -11.9        | 21.6        | 1.2         | -2.8        | 5.1         |
| Penta3                     | Jun 2020                  | -2.6        | -14.2        | 9.0         | -3.7         | -20.2        | 12.9        | -0.9        | -4.8        | 3.1         |
| Penta3                     | Jul 2020                  | 1.8         | -9.8         | 13.4        | 2.5          | -14.0        | 19.1        | 0.6         | -3.3        | 4.6         |
| Penta3                     | Aug 2020                  | 6.9         | -5.0         | 18.8        | 9.8          | -7.7         | 27.3        | 2.3         | -1.7        | 6.4         |
| Penta3                     | Sep 2020                  | 24.0        | 9.0          | 38.9        | 34.2         | 7.9          | 60.4        | 8.1         | 3.3         | 13.0        |
| Penta3                     | Oct 2020                  | 6.5         | -5.3         | 18.4        | 9.3          | -8.1         | 26.7        | 2.2         | -1.8        | 6.3         |
| Penta3                     | Nov 2020                  | 27.8        | 11.8         | 43.7        | 39.6         | 10.7         | 68.5        | 9.4         | 4.3         | 14.6        |
| Penta3                     | Dec 2020                  | 0.0         | -11.6        | 11.5        | -0.1         | -16.5        | 16.4        | 0.0         | -4.0        | 3.9         |
| <b>Penta3</b>              | <b>Total Covid Period</b> | <b>3.6</b>  | <b>-2.6</b>  | <b>9.8</b>  | <b>5.1</b>   | <b>-4.0</b>  | <b>14.3</b> | <b>1.2</b>  | <b>-0.9</b> | <b>3.3</b>  |
| C-section                  | Mar 2020                  | -22.7       | -50.8        | 5.5         | -37.5        | -91.4        | 16.5        | -6.3        | -14.0       | 1.3         |
| C-section                  | Apr 2020                  | -1.4        | -27.5        | 24.7        | -2.3         | -45.7        | 41.1        | -0.4        | -7.7        | 6.9         |
| C-section                  | May 2020                  | 18.6        | -9.4         | 46.7        | 31.1         | -21.3        | 83.4        | 5.2         | -2.4        | 12.7        |
| C-section                  | Jun 2020                  | 1.0         | -25.1        | 27.2        | 1.7          | -41.7        | 45.2        | 0.3         | -7.0        | 7.6         |
| C-section                  | Jul 2020                  | 1.7         | -24.5        | 27.9        | 2.8          | -40.7        | 46.4        | 0.5         | -6.8        | 7.8         |
| C-section                  | Aug 2020                  | -9.9        | -36.4        | 16.5        | -16.5        | -61.9        | 29.0        | -2.8        | -10.1       | 4.6         |
| C-section                  | Sep 2020                  | -12.3       | -39.0        | 14.3        | -20.5        | -67.1        | 26.2        | -3.5        | -10.8       | 3.9         |
| C-section                  | Oct 2020                  | -11.0       | -37.6        | 15.5        | -18.3        | -64.2        | 27.7        | -3.1        | -10.4       | 4.3         |
| C-section                  | Nov 2020                  | -5.4        | -31.6        | 20.8        | -8.9         | -52.8        | 35.0        | -1.5        | -8.8        | 5.8         |
| C-section                  | Dec 2020                  | 1.0         | -25.2        | 27.1        | 1.6          | -41.8        | 45.1        | 0.3         | -7.0        | 7.6         |
| <b>C-section</b>           | <b>Total Covid Period</b> | <b>-4.0</b> | <b>-16.5</b> | <b>8.4</b>  | <b>-6.6</b>  | <b>-27.6</b> | <b>14.3</b> | <b>-1.1</b> | <b>-4.6</b> | <b>2.4</b>  |
| Measles vaccination        | Mar 2020                  | -14.1       | -28.6        | 0.4         | -21.1        | -45.7        | 3.5         | -4.5        | -8.9        | 0.0         |
| Measles vaccination        | Apr 2020                  | -44.0       | -67.5        | -20.6       | -65.6        | -115.7       | -15.4       | -14.0       | -20.7       | -7.4        |
| Measles vaccination        | May 2020                  | -1.4        | -14.5        | 11.7        | -2.1         | -21.8        | 17.6        | -0.4        | -4.6        | 3.7         |
| Measles vaccination        | Jun 2020                  | -5.3        | -18.6        | 8.0         | -7.9         | -28.3        | 12.5        | -1.7        | -5.9        | 2.5         |
| Measles vaccination        | Jul 2020                  | -4.5        | -17.7        | 8.8         | -6.7         | -26.9        | 13.4        | -1.4        | -5.6        | 2.8         |
| Measles vaccination        | Aug 2020                  | -3.6        | -16.8        | 9.6         | -5.4         | -25.4        | 14.5        | -1.1        | -5.3        | 3.0         |
| Measles vaccination        | Sep 2020                  | 2.5         | -10.7        | 15.7        | 3.7          | -16.1        | 23.6        | 0.8         | -3.4        | 4.9         |
| Measles vaccination        | Oct 2020                  | -2.1        | -15.2        | 11.0        | -3.2         | -22.9        | 16.6        | -0.7        | -4.8        | 3.5         |
| Measles vaccination        | Nov 2020                  | 23.3        | 6.3          | 40.3        | 35.1         | 2.6          | 67.5        | 7.3         | 2.4         | 12.3        |
| Measles vaccination        | Dec 2020                  | 19.6        | 3.6          | 35.6        | 29.4         | 0.2          | 58.7        | 6.2         | 1.4         | 10.9        |
| <b>Measles vaccination</b> | <b>Total Covid Period</b> | <b>-3.0</b> | <b>-9.8</b>  | <b>3.7</b>  | <b>-4.5</b>  | <b>-14.9</b> | <b>5.8</b>  | <b>-1.0</b> | <b>-3.1</b> | <b>1.2</b>  |
| OPD                        | Mar 2020                  | -6.3        | -17.5        | 4.9         | -9.5         | -27.2        | 8.2         | -2.0        | -5.5        | 1.5         |
| OPD                        | Apr 2020                  | -28.4       | -44.8        | -12.0       | -42.6        | -76.5        | -8.7        | -9.0        | -13.7       | -4.2        |
| OPD                        | May 2020                  | -21.6       | -35.9        | -7.3        | -32.4        | -60.4        | -4.5        | -6.8        | -11.1       | -2.6        |
| OPD                        | Jun 2020                  | 7.1         | -4.2         | 18.5        | 10.8         | -7.4         | 29.0        | 2.2         | -1.3        | 5.8         |
| OPD                        | Jul 2020                  | -6.2        | -17.5        | 5.0         | -9.4         | -27.0        | 8.2         | -2.0        | -5.5        | 1.5         |
| OPD                        | Aug 2020                  | -2.6        | -13.6        | 8.3         | -4.0         | -20.6        | 12.7        | -0.8        | -4.3        | 2.6         |
| OPD                        | Sep 2020                  | -0.4        | -11.3        | 10.5        | -0.5         | -17.0        | 15.9        | -0.1        | -3.5        | 3.3         |
| OPD                        | Oct 2020                  | -17.9       | -31.3        | -4.6        | -26.9        | -51.9        | -2.0        | -5.6        | -9.7        | -1.6        |
| OPD                        | Nov 2020                  | -5.3        | -16.4        | 5.8         | -8.0         | -25.3        | 9.3         | -1.7        | -5.1        | 1.8         |
| OPD                        | Dec 2020                  | 9.4         | -2.3         | 21.1        | 14.2         | -5.2         | 33.6        | 3.0         | -0.6        | 6.6         |
| <b>OPD</b>                 | <b>Total Covid Period</b> | <b>-7.1</b> | <b>-13.2</b> | <b>-1.0</b> | <b>-10.6</b> | <b>-21.3</b> | <b>0.0</b>  | <b>-2.3</b> | <b>-4.2</b> | <b>-0.4</b> |



| NIGER               |                    |          |             |             |         |             |             |         |             |             |
|---------------------|--------------------|----------|-------------|-------------|---------|-------------|-------------|---------|-------------|-------------|
| Indicator           | Month/Period       | National |             |             | Rural   |             |             | Urban   |             |             |
|                     |                    | %change  | Lower bound | Upper bound | %change | Lower bound | Upper bound | %change | Lower bound | Upper bound |
| ANC1                | Mar 2020           | -14.2    | -19.4       | -9.0        | -25.9   | -37.8       | -14.0       | -11.4   | -15.6       | -7.3        |
| ANC1                | Apr 2020           | 9.7      | 4.6         | 14.8        | 17.8    | 7.1         | 28.5        | 7.8     | -3.7        | 11.9        |
| ANC1                | May 2020           | 8.3      | 3.2         | 13.4        | 15.1    | 4.8         | 25.4        | 6.7     | 2.6         | 10.8        |
| ANC1                | Jun 2020           | 28.8     | 23.0        | 34.7        | 53.0    | 34.3        | 71.6        | 23.2    | 18.5        | 27.9        |
| ANC1                | Jul 2020           | -11.2    | -16.3       | -6.1        | -20.4   | -31.4       | -9.5        | -9.0    | -13.1       | -4.9        |
| ANC1                | Aug 2020           | -4.1     | -9.1        | 0.9         | -7.5    | -16.9       | 1.9         | -3.3    | -7.3        | 0.8         |
| ANC1                | Sep 2020           | 0.5      | -4.5        | 5.5         | 1.0     | -8.2        | 10.1        | 0.4     | -3.6        | 4.5         |
| ANC1                | Oct 2020           | -6.9     | -12.0       | -1.9        | -12.7   | -22.5       | -2.8        | -5.6    | -9.6        | -1.5        |
| ANC1                | Nov 2020           | -5.4     | -10.4       | -0.3        | -9.8    | -19.4       | -0.2        | -4.3    | -8.4        | -0.3        |
| ANC1                | Dec 2020           | -4.9     | -10.0       | 0.1         | -9.0    | -18.5       | 0.5         | -4.0    | -8.0        | 0.1         |
| ANC1                | Total Covid Period | 0.0      | -2.2        | 2.2         | 0.1     | -4.0        | 4.1         | 0.0     | -1.8        | 1.8         |
| ANC4                | Mar 2020           | -5.8     | -11.8       | 0.3         | -10.5   | -21.8       | 0.9         | -4.6    | -9.5        | 0.2         |
| ANC4                | Apr 2020           | -1.0     | -6.9        | 5.0         | -1.7    | -12.6       | 9.2         | -0.8    | -5.6        | 4.1         |
| ANC4                | May 2020           | 18.7     | 12.4        | 25.1        | 34.2    | 18.6        | 49.8        | 15.1    | 10.0        | 20.2        |
| ANC4                | Jun 2020           | 7.8      | 1.7         | 13.9        | 14.3    | 2.4         | 26.1        | 6.3     | 1.4         | 11.2        |
| ANC4                | Jul 2020           | -5.3     | -11.3       | 0.7         | -9.7    | -21.0       | 1.6         | -4.3    | -9.1        | 0.6         |
| ANC4                | Aug 2020           | 3.1      | -2.9        | 9.1         | 5.7     | -5.4        | 16.8        | 2.5     | -2.3        | 7.4         |
| ANC4                | Sep 2020           | 4.2      | -1.8        | 10.2        | 7.6     | -3.6        | 18.8        | 3.4     | -1.5        | 8.2         |
| ANC4                | Oct 2020           | -1.7     | -7.7        | 4.3         | -3.1    | -14.0       | 7.8         | -1.4    | -6.2        | 3.5         |
| ANC4                | Nov 2020           | -7.5     | -13.5       | -1.5        | -13.7   | -25.4       | -2.0        | -6.1    | -10.9       | -1.2        |
| ANC4                | Dec 2020           | -7.1     | -13.1       | -1.1        | -12.9   | -24.5       | -1.3        | -5.7    | -10.6       | -0.9        |
| ANC4                | Total Covid Period | 0.5      | -2.1        | 3.1         | 1.0     | -3.8        | 5.7         | 0.4     | -1.7        | 2.5         |
| Deliveries          | Mar 2020           | 0.3      | -5.4        | 6.0         | 0.6     | -11.2       | 12.3        | 0.2     | -4.3        | 4.7         |
| Deliveries          | Apr 2020           | -10.2    | -16.0       | -4.5        | -21.0   | -34.7       | -7.4        | -8.0    | -12.6       | -3.5        |
| Deliveries          | May 2020           | 5.9      | 0.1         | 11.6        | 12.1    | -0.4        | 24.6        | 4.6     | 0.1         | 9.1         |
| Deliveries          | Jun 2020           | -9.4     | -15.2       | -3.7        | -19.4   | -32.7       | -6.0        | -7.4    | -11.9       | -2.9        |
| Deliveries          | Jul 2020           | -17.6    | -23.5       | -11.6       | -36.1   | -52.8       | -19.4       | -13.8   | -18.4       | -9.2        |
| Deliveries          | Aug 2020           | 2.0      | -3.7        | 7.7         | 4.0     | -7.8        | 15.9        | 1.5     | -2.9        | 6.0         |
| Deliveries          | Sep 2020           | -4.9     | -10.7       | 0.8         | -10.2   | -22.4       | 2.0         | -3.9    | -8.4        | 0.6         |
| Deliveries          | Oct 2020           | -0.9     | -6.6        | 4.8         | -1.9    | -13.7       | 9.8         | -0.7    | -5.2        | 3.7         |
| Deliveries          | Nov 2020           | -10.9    | -16.7       | -5.2        | -22.5   | -36.4       | -8.6        | -8.6    | -13.1       | -4.1        |
| Deliveries          | Dec 2020           | -11.4    | -17.2       | -5.7        | -23.5   | -37.6       | -9.5        | -9.0    | -13.5       | -4.5        |
| Deliveries          | Total Covid Period | -5.7     | -8.2        | -3.2        | -11.6   | -17.7       | -5.4        | -4.5    | -6.4        | -2.5        |
| Penta1              | Mar 2020           | -3.8     | -7.8        | 0.3         | -7.3    | -15.6       | 1.0         | -3.0    | -6.2        | 0.2         |
| Penta1              | Apr 2020           | 1.2      | -2.8        | 5.3         | 2.3     | -5.6        | 10.3        | 1.0     | -2.3        | 4.2         |
| Penta1              | May 2020           | 4.9      | 0.8         | 9.0         | 9.5     | 0.9         | 18.1        | 3.9     | 0.6         | 7.1         |
| Penta1              | Jun 2020           | 9.2      | 5.0         | 13.4        | 17.8    | 7.6         | 28.1        | 7.3     | 4.0         | 10.6        |
| Penta1              | Jul 2020           | -4.6     | -8.6        | -0.5        | -8.8    | -17.3       | -0.4        | -3.6    | -6.9        | -0.4        |
| Penta1              | Aug 2020           | -3.1     | -7.2        | 0.9         | -6.0    | -14.2       | 2.1         | -2.5    | -5.7        | 0.8         |
| Penta1              | Sep 2020           | -0.5     | -4.6        | 3.5         | -1.0    | -8.9        | 6.9         | -0.4    | -3.6        | 2.8         |
| Penta1              | Oct 2020           | -1.7     | -5.8        | 2.3         | -3.3    | -11.3       | 4.6         | -1.4    | -4.6        | 1.9         |
| Penta1              | Nov 2020           | -2.7     | -6.8        | 1.3         | -5.3    | -13.4       | 2.7         | -2.2    | -5.4        | 1.0         |
| Penta1              | Dec 2020           | -1.8     | -5.8        | 2.3         | -3.4    | -11.4       | 4.5         | -1.4    | -4.6        | 1.8         |
| Penta1              | Total Covid Period | -0.3     | -2.0        | 1.4         | -0.6    | -4.0        | 2.8         | -0.2    | -1.6        | 1.1         |
| Penta3              | Mar 2020           | -3.6     | -7.8        | 0.7         | -7.0    | -15.7       | 1.6         | -2.8    | -6.2        | 0.5         |
| Penta3              | Apr 2020           | 1.3      | -2.9        | 5.5         | 2.5     | -5.8        | 10.9        | 1.0     | -2.3        | 4.4         |
| Penta3              | May 2020           | 4.5      | 0.3         | 8.8         | 8.9     | 0.0         | 17.9        | 3.6     | 0.2         | 7.0         |
| Penta3              | Jun 2020           | 2.9      | -1.3        | 7.2         | 5.8     | -2.8        | 14.4        | 2.3     | -1.0        | 5.7         |
| Penta3              | Jul 2020           | -3.5     | -7.8        | 0.7         | -7.0    | -15.6       | 1.7         | -2.8    | -6.2        | 0.5         |
| Penta3              | Aug 2020           | -3.3     | -7.6        | 0.9         | -6.6    | -15.2       | 2.1         | -2.6    | -6.0        | 0.7         |
| Penta3              | Sep 2020           | -2.1     | -6.3        | 2.1         | -4.1    | -12.6       | 4.3         | -1.7    | -5.0        | 1.7         |
| Penta3              | Oct 2020           | -1.1     | -5.3        | 3.1         | -2.2    | -10.6       | 6.1         | -0.9    | -4.2        | 2.4         |
| Penta3              | Nov 2020           | -3.7     | -7.9        | 0.6         | -7.2    | -15.9       | 1.5         | -2.9    | -6.3        | 0.4         |
| Penta3              | Dec 2020           | -3.2     | -7.5        | 1.0         | -6.4    | -15.0       | 2.2         | -2.6    | -5.9        | 0.8         |
| Penta3              | Total Covid Period | -1.2     | -3.0        | 0.6         | -2.3    | -5.9        | 1.3         | -0.9    | -2.4        | 0.5         |
| C-section           | Mar 2020           | -17.6    | -51.1       | 15.9        |         |             |             |         |             |             |
| C-section           | Apr 2020           | -5.0     | -36.3       | 26.3        |         |             |             |         |             |             |
| C-section           | May 2020           | -10.1    | -42.0       | 21.8        |         |             |             |         |             |             |
| C-section           | Jun 2020           | -3.5     | -34.7       | 27.7        |         |             |             |         |             |             |
| C-section           | Jul 2020           | -7.1     | -38.6       | 24.4        |         |             |             |         |             |             |
| C-section           | Aug 2020           | -22.9    | -58.0       | 12.2        |         |             |             |         |             |             |
| C-section           | Sep 2020           | 8.6      | -23.2       | 40.5        |         |             |             |         |             |             |
| C-section           | Oct 2020           | -10.3    | -42.2       | 21.6        |         |             |             |         |             |             |
| C-section           | Nov 2020           | -11.3    | -43.4       | 20.8        |         |             |             |         |             |             |
| C-section           | Dec 2020           | -29.2    | -66.6       | 8.2         |         |             |             |         |             |             |
| C-section           | Total Covid Period | -10.6    | -25.6       | 4.3         |         |             |             |         |             |             |
| Measles vaccination | Mar 2020           | -4.6     | -9.3        | 0.1         | -8.8    | -18.4       | 0.7         | -3.7    | -7.4        | 0.1         |
| Measles vaccination | Apr 2020           | 0.7      | -4.0        | 5.4         | 1.4     | -7.6        | 10.4        | 0.6     | -3.2        | 4.3         |
| Measles vaccination | May 2020           | 3.9      | -0.8        | 8.6         | 7.5     | -1.9        | 17.0        | 3.1     | -0.6        | 6.9         |
| Measles vaccination | Jun 2020           | 7.5      | 2.7         | 12.3        | 14.4    | 3.9         | 24.9        | 6.0     | 2.1         | 9.8         |
| Measles vaccination | Jul 2020           | -3.1     | -7.8        | 1.6         | -6.0    | -15.3       | 3.2         | -2.5    | -6.2        | 1.3         |
| Measles vaccination | Aug 2020           | -6.3     | -11.1       | -1.6        | -12.2   | -22.2       | -2.2        | -5.1    | -8.8        | -1.3        |
| Measles vaccination | Sep 2020           | -0.5     | -5.2        | 4.2         | -1.0    | -10.0       | 8.0         | -0.4    | -4.1        | 3.3         |
| Measles vaccination | Oct 2020           | -0.8     | -5.5        | 3.9         | -1.5    | -10.5       | 7.5         | -0.6    | -4.3        | 3.1         |
| Measles vaccination | Nov 2020           | -5.4     | -10.1       | -0.7        | -10.3   | -20.1       | -0.6        | -4.3    | -8.0        | -0.5        |
| Measles vaccination | Dec 2020           | -5.8     | -10.5       | -1.0        | -11.1   | -20.9       | -1.2        | -4.6    | -8.4        | -0.8        |
| Measles vaccination | Total Covid Period | -1.4     | -3.4        | 0.6         | -2.8    | -6.7        | 1.2         | -1.1    | -2.8        | 0.5         |
| OPD                 | Mar 2020           | -8.2     | -18.7       | 2.4         | -14.4   | -33.6       | 4.7         | -6.6    | -15.2       | 2.0         |
| OPD                 | Apr 2020           | 9.4      | -1.3        | 20.1        | 16.7    | -2.9        | 36.3        | 7.6     | -1.0        | 16.3        |
| OPD                 | May 2020           | 1.0      | -9.6        | 11.6        | 1.8     | -17.0       | 20.5        | 0.8     | -7.8        | 9.4         |
| OPD                 | Jun 2020           | -5.5     | -16.0       | 5.1         | -9.7    | -28.6       | 9.2         | -4.4    | -13.0       | 4.1         |
| OPD                 | Jul 2020           | -17.6    | -28.3       | -7.0        | -31.2   | -52.2       | -10.2       | -14.3   | -23.0       | -5.7        |
| OPD                 | Aug 2020           | -7.4     | -17.9       | 3.2         | -13.0   | -32.1       | 6.0         | -6.0    | -14.6       | 2.6         |
| OPD                 | Sep 2020           | 0.7      | -9.9        | 11.3        | 1.2     | -17.5       | 20.0        | 0.6     | -8.0        | 9.1         |
| OPD                 | Oct 2020           | 8.1      | -2.6        | 18.7        | 14.3    | -5.1        | 33.7        | 6.5     | -2.1        | 15.2        |
| OPD                 | Nov 2020           | 14.7     | 4.0         | 25.5        | 26.2    | 5.4         | 46.9        | 12.0    | 3.2         | 20.7        |
| OPD                 | Dec 2020           | 22.0     | 11.0        | 33.0        | 39.1    | 16.2        | 62.0        | 17.8    | 9.0         | 26.7        |
| OPD                 | Total Covid Period | 1.7      | -2.9        | 6.3         | 3.0     | -5.2        | 11.2        | 1.4     | -2.3        | 5.1         |
| IPD                 | Mar 2020           | -24.9    | -62.6       | 12.7        | -96.5   | -388.2      | 195.3       | -17.7   | -44.3       | 8.8         |
| IPD                 | Apr 2020           | -47.4    | -88.4       | -6.4        | -180.9  | -673.0      | 311.1       | -33.8   | -62.1       | -5.4        |
| IPD                 | May 2020           | -19.0    | -56.1       | 18.1        | -73.9   | -315.7      | 168.0       | -13.5   | -39.8       | 12.7        |
| IPD                 | Jun 2020           | -10.1    | -46.7       | 26.4        | -39.6   | -216.5      | 137.3       | -7.2    | -33.2       | 18.8        |
| IPD                 | Jul 2020           | -27.9    | -65.9       | 10.1        | -107.7  | -425.4      | 210.0       | -19.9   | -46.6       | 6.9         |
| IPD                 | Aug 2020           | -40.7    | -80.5       | -0.8        | -155.9  | -587.9      | 276.1       | -29.0   | -56.7       | -1.3        |
| IPD                 | Sep 2020           | -38.2    | -77.6       | 1.2         | -146.5  | -556.0      | 263.0       | -27.2   | -54.7       | 0.3         |
| IPD                 | Oct 2020           | -42.1    | -82.1       | -2.0        | -161.1  | -605.4      | 283.3       | -30.0   | -57.8       | -2.1        |
| IPD                 | Nov 2020           | -8.4     | -44.9       | 28.2        | -32.7   | -199.5      | 134.1       | -6.0    | -31.9       | 20.0        |
| IPD                 | Dec 2020           | 17.6     | -19.9       | 55.1        | 69.8    | -172.6      | 312.1       | 12.5    | -14.0       | 38.9        |
| IPD                 | Total Covid Period | -23.2    | -40.3       | -6.1        | -79.8   | -266.3      | 106.7       | -16.7   | -28.7       | -4.7        |

**TANZANIA**

| Indicator                  | Month/Period              | National     |              |             | Rural        |              |              | Urban       |             |             |
|----------------------------|---------------------------|--------------|--------------|-------------|--------------|--------------|--------------|-------------|-------------|-------------|
|                            |                           | %change      | Lower bound  | Upper bound | %change      | Lower bound  | Upper bound  | %change     | Lower bound | Upper bound |
| ANC1                       | Mar 2020                  | 5.6          | 3.5          | 7.7         | 5.6          | 3.5          | 7.8          | 5.4         | 3.3         | 7.5         |
| ANC1                       | Apr 2020                  | 1.6          | -0.5         | 3.6         | 1.6          | -0.5         | 3.7          | 1.5         | -0.5        | 3.5         |
| ANC1                       | May 2020                  | -15.6        | -17.9        | -13.3       | -15.8        | -18.2        | -13.4        | -15.1       | -17.8       | -12.4       |
| ANC1                       | Jun 2020                  | 5.8          | 3.7          | 7.9         | 5.9          | 3.7          | 8.0          | 5.6         | 3.5         | 7.7         |
| ANC1                       | Jul 2020                  | -9.3         | -11.4        | -7.1        | -9.4         | -11.6        | -7.2         | -9.0        | -11.2       | -6.7        |
| ANC1                       | Aug 2020                  | -3.8         | -5.9         | -1.7        | -3.9         | -6.0         | -1.7         | -3.7        | -5.7        | -1.6        |
| ANC1                       | Sep 2020                  | 2.7          | 0.6          | 4.8         | 2.8          | 0.7          | 4.9          | 2.6         | 0.6         | 4.7         |
| ANC1                       | Oct 2020                  | -12.8        | -15.0        | -10.5       | -12.9        | -15.2        | -10.6        | -12.4       | -14.8       | -9.9        |
| ANC1                       | Nov 2020                  | -1.1         | -3.2         | 0.9         | -1.2         | -3.3         | 0.9          | -1.1        | -3.1        | 0.9         |
| ANC1                       | Dec 2020                  | 1.4          | -0.7         | 3.4         | 1.4          | -0.7         | 3.5          | 1.3         | -0.7        | 3.3         |
| <b>ANC1</b>                | <b>Total Covid Period</b> | <b>-2.6</b>  | <b>-3.5</b>  | <b>-1.6</b> | <b>-2.6</b>  | <b>-3.5</b>  | <b>-1.6</b>  | <b>-2.5</b> | <b>-3.4</b> | <b>-1.5</b> |
| ANC4                       | Mar 2020                  | -5.5         | -8.9         | -2.1        | -5.6         | -9.1         | -2.1         | -5.2        | -8.4        | -1.9        |
| ANC4                       | Apr 2020                  | -3.1         | -6.5         | 0.3         | -3.1         | -6.6         | 0.3          | -2.9        | -6.1        | 0.3         |
| ANC4                       | May 2020                  | -6.5         | -9.9         | -3.1        | -6.7         | -10.2        | -3.2         | -6.2        | -9.4        | -2.9        |
| ANC4                       | Jun 2020                  | -1.8         | -5.2         | 1.6         | -1.9         | -5.3         | 1.6          | -1.7        | -4.9        | 1.5         |
| ANC4                       | Jul 2020                  | -8.2         | -11.6        | -4.8        | -8.4         | -11.9        | -4.9         | -7.7        | -11.0       | -4.4        |
| ANC4                       | Aug 2020                  | -10.2        | -13.6        | -6.7        | -10.4        | -14.0        | -6.8         | -9.6        | -12.9       | -6.2        |
| ANC4                       | Sep 2020                  | -7.8         | -11.2        | -4.3        | -7.9         | -11.4        | -4.4         | -7.3        | -10.6       | -4.0        |
| ANC4                       | Oct 2020                  | -16.0        | -19.6        | -12.4       | -16.4        | -20.1        | -12.7        | -15.1       | -18.7       | -11.5       |
| ANC4                       | Nov 2020                  | -11.6        | -15.1        | -8.1        | -11.9        | -15.5        | -8.3         | -10.9       | -14.3       | -7.6        |
| ANC4                       | Dec 2020                  | -12.7        | -16.2        | -9.2        | -13.0        | -16.6        | -9.3         | -11.9       | -15.3       | -8.5        |
| <b>ANC4</b>                | <b>Total Covid Period</b> | <b>-8.2</b>  | <b>-9.8</b>  | <b>-6.7</b> | <b>-8.4</b>  | <b>-10.0</b> | <b>-6.8</b>  | <b>-7.7</b> | <b>-9.3</b> | <b>-6.2</b> |
| Deliveries                 | Mar 2020                  | -2.0         | -4.5         | 0.6         | -2.2         | -5.0         | 0.7          | -1.5        | -3.5        | 0.5         |
| Deliveries                 | Apr 2020                  | -2.1         | -4.6         | 0.5         | -2.3         | -5.1         | 0.5          | -1.6        | -3.6        | 0.4         |
| Deliveries                 | May 2020                  | -1.3         | -3.9         | 1.2         | -1.5         | -4.3         | 1.4          | -1.0        | -3.0        | 1.0         |
| Deliveries                 | Jun 2020                  | -0.1         | -2.7         | 2.4         | -0.1         | -3.0         | 2.7          | -0.1        | -2.1        | 1.9         |
| Deliveries                 | Jul 2020                  | -3.0         | -5.5         | -0.4        | -3.3         | -6.2         | -0.5         | -2.3        | -4.3        | -0.3        |
| Deliveries                 | Aug 2020                  | -6.9         | -9.5         | -4.3        | -7.6         | -10.5        | -4.7         | -5.4        | -7.4        | -3.3        |
| Deliveries                 | Sep 2020                  | -9.4         | -12.1        | -6.8        | -10.5        | -13.4        | -7.5         | -7.4        | -9.5        | -5.3        |
| Deliveries                 | Oct 2020                  | -15.6        | -18.3        | -12.8       | -17.2        | -20.4        | -14.1        | -12.2       | -14.5       | -9.9        |
| Deliveries                 | Nov 2020                  | -14.6        | -17.4        | -11.9       | -16.2        | -19.3        | -13.1        | -11.5       | -13.7       | -9.2        |
| Deliveries                 | Dec 2020                  | -14.1        | -16.8        | -11.4       | -15.6        | -18.7        | -12.5        | -11.0       | -13.3       | -8.8        |
| <b>Deliveries</b>          | <b>Total Covid Period</b> | <b>-6.8</b>  | <b>-8.0</b>  | <b>-5.7</b> | <b>-7.5</b>  | <b>-8.9</b>  | <b>-6.2</b>  | <b>-5.4</b> | <b>-6.4</b> | <b>-4.4</b> |
| Penta1                     | Mar 2020                  | -3.4         | -5.9         | -0.8        | -3.3         | -5.8         | -0.8         | -3.5        | -6.1        | -0.8        |
| Penta1                     | Apr 2020                  | -4.6         | -7.2         | -2.1        | -4.6         | -7.1         | -2.0         | -4.8        | -7.4        | -2.1        |
| Penta1                     | May 2020                  | -6.2         | -8.8         | -3.7        | -6.1         | -8.7         | -3.6         | -6.4        | -9.1        | -3.7        |
| Penta1                     | Jun 2020                  | 5.0          | 2.5          | 7.6         | 5.0          | 2.5          | 7.5          | 5.2         | 2.5         | 7.9         |
| Penta1                     | Jul 2020                  | -4.9         | -7.4         | -2.3        | -4.8         | -7.3         | -2.3         | -5.0        | -7.7        | -2.3        |
| Penta1                     | Aug 2020                  | -2.8         | -5.4         | -0.3        | -2.8         | -5.3         | -0.3         | -2.9        | -5.5        | -0.3        |
| Penta1                     | Sep 2020                  | 4.4          | 1.9          | 7.0         | 4.4          | 1.9          | 6.9          | 4.6         | 1.9         | 7.3         |
| Penta1                     | Oct 2020                  | -8.7         | -11.3        | -6.2        | -8.6         | -11.2        | -6.1         | -9.0        | -11.8       | -6.2        |
| Penta1                     | Nov 2020                  | -7.9         | -10.4        | -5.3        | -7.8         | -10.3        | -5.2         | -8.1        | -10.9       | -5.4        |
| Penta1                     | Dec 2020                  | -10.2        | -12.8        | -7.6        | -10.1        | -12.7        | -7.5         | -10.6       | -13.4       | -7.7        |
| <b>Penta1</b>              | <b>Total Covid Period</b> | <b>-3.9</b>  | <b>-5.0</b>  | <b>-2.8</b> | <b>-3.9</b>  | <b>-4.9</b>  | <b>-2.8</b>  | <b>-4.0</b> | <b>-5.2</b> | <b>-2.8</b> |
| Penta3                     | Mar 2020                  | -2.8         | -5.8         | 0.2         | -2.8         | -5.7         | 0.2          | -2.8        | -5.9        | 0.2         |
| Penta3                     | Apr 2020                  | -5.2         | -8.2         | -2.2        | -5.2         | -8.2         | -2.2         | -5.3        | -8.4        | -2.2        |
| Penta3                     | May 2020                  | -7.5         | -10.5        | -4.5        | -7.4         | -10.4        | -4.4         | -7.6        | -10.8       | -4.5        |
| Penta3                     | Jun 2020                  | -1.3         | -4.3         | 1.6         | -1.3         | -4.3         | 1.6          | -1.4        | -4.4        | 1.7         |
| Penta3                     | Jul 2020                  | -9.1         | -12.2        | -6.1        | -9.1         | -12.1        | -6.1         | -9.3        | -12.5       | -6.1        |
| Penta3                     | Aug 2020                  | -5.2         | -8.2         | -2.2        | -5.2         | -8.1         | -2.2         | -5.3        | -8.4        | -2.2        |
| Penta3                     | Sep 2020                  | 0.3          | -2.7         | 3.3         | 0.3          | -2.7         | 3.3          | 0.3         | -2.7        | 3.3         |
| Penta3                     | Oct 2020                  | -7.5         | -10.5        | -4.5        | -7.4         | -10.4        | -4.4         | -7.6        | -10.7       | -4.5        |
| Penta3                     | Nov 2020                  | -7.7         | -10.7        | -4.7        | -7.7         | -10.7        | -4.7         | -7.9        | -11.0       | -4.7        |
| Penta3                     | Dec 2020                  | -11.6        | -14.6        | -8.6        | -11.5        | -14.6        | -8.5         | -11.8       | -15.1       | -8.5        |
| <b>Penta3</b>              | <b>Total Covid Period</b> | <b>-5.7</b>  | <b>-7.0</b>  | <b>-4.4</b> | <b>-5.7</b>  | <b>-7.0</b>  | <b>-4.4</b>  | <b>-5.8</b> | <b>-7.2</b> | <b>-4.4</b> |
| C-section                  | Mar 2020                  | -0.3         | -5.5         | 4.9         | -0.4         | -8.4         | 7.6          | -0.1        | -2.8        | 2.5         |
| C-section                  | Apr 2020                  | 0.2          | -5.0         | 5.4         | 0.4          | -7.6         | 8.4          | 0.1         | -2.5        | 2.7         |
| C-section                  | May 2020                  | -1.3         | -6.5         | 3.9         | -2.0         | -10.1        | 6.0          | -0.7        | -3.3        | 2.0         |
| C-section                  | Jun 2020                  | 4.2          | -1.0         | 9.5         | 6.5          | -1.6         | 14.7         | 2.1         | -0.5        | 4.8         |
| C-section                  | Jul 2020                  | 1.4          | -3.8         | 6.6         | 2.1          | -5.9         | 10.2         | 0.7         | -1.9        | 3.3         |
| C-section                  | Aug 2020                  | -0.6         | -5.8         | 4.6         | -0.9         | -8.9         | 7.1          | -0.3        | -2.9        | 2.3         |
| C-section                  | Sep 2020                  | 0.8          | -4.4         | 6.0         | 1.3          | -6.8         | 9.3          | 0.4         | -2.2        | 3.0         |
| C-section                  | Oct 2020                  | -7.3         | -12.6        | -2.1        | -11.3        | -19.7        | -2.9         | -3.7        | -6.4        | -1.0        |
| C-section                  | Nov 2020                  | -2.3         | -7.5         | 2.9         | -3.6         | -11.7        | 4.4          | -1.2        | -3.8        | 1.4         |
| C-section                  | Dec 2020                  | -2.7         | -7.9         | 2.5         | -4.2         | -12.3        | 3.9          | -1.4        | -4.0        | 1.3         |
| <b>C-section</b>           | <b>Total Covid Period</b> | <b>-0.8</b>  | <b>-3.0</b>  | <b>1.4</b>  | <b>-1.2</b>  | <b>-4.6</b>  | <b>2.2</b>   | <b>-0.4</b> | <b>-1.5</b> | <b>0.7</b>  |
| Measles vaccination        | Mar 2020                  | 5.0          | 1.8          | 8.1         | 4.9          | 1.8          | 8.1          | 5.1         | 1.8         | 8.3         |
| Measles vaccination        | Apr 2020                  | -6.6         | -9.7         | -3.4        | -6.5         | -9.7         | -3.4         | -6.7        | -10.0       | -3.4        |
| Measles vaccination        | May 2020                  | 0.4          | -2.8         | 3.5         | 0.4          | -2.7         | 3.5          | 0.4         | -2.8        | 3.6         |
| Measles vaccination        | Jun 2020                  | 4.3          | 1.2          | 7.5         | 4.3          | 1.1          | 7.4          | 4.4         | 1.1         | 7.6         |
| Measles vaccination        | Jul 2020                  | -11.8        | -15.0        | -8.6        | -11.7        | -14.9        | -8.5         | -12.0       | -15.5       | -8.5        |
| Measles vaccination        | Aug 2020                  | -11.9        | -15.2        | -8.7        | -11.9        | -15.1        | -8.7         | -12.2       | -15.7       | -8.7        |
| Measles vaccination        | Sep 2020                  | 7.6          | 4.4          | 10.7        | 7.5          | 4.3          | 10.7         | 7.7         | 4.4         | 11.0        |
| Measles vaccination        | Oct 2020                  | -0.2         | -3.3         | 3.0         | -0.2         | -3.3         | 2.9          | -0.2        | -3.4        | 3.0         |
| Measles vaccination        | Nov 2020                  | -5.1         | -8.2         | -1.9        | -5.0         | -8.2         | -1.9         | -5.2        | -8.4        | -1.9        |
| Measles vaccination        | Dec 2020                  | -7.5         | -10.7        | -4.3        | -7.5         | -10.6        | -4.3         | -7.7        | -11.0       | -4.3        |
| <b>Measles vaccination</b> | <b>Total Covid Period</b> | <b>-2.6</b>  | <b>-3.9</b>  | <b>-1.2</b> | <b>-2.6</b>  | <b>-3.9</b>  | <b>-1.2</b>  | <b>-2.6</b> | <b>-4.0</b> | <b>-1.2</b> |
| OPD                        | Mar 2020                  | 12.7         | 8.0          | 17.4        | 16.1         | 9.8          | 22.3         | 8.0         | 5.0         | 11.0        |
| OPD                        | Apr 2020                  | -5.5         | -10.0        | -1.0        | -6.9         | -12.7        | -1.2         | -3.5        | -6.3        | -0.6        |
| OPD                        | May 2020                  | -22.3        | -27.4        | -17.3       | -28.1        | -35.3        | -21.0        | -14.1       | -17.5       | -10.7       |
| OPD                        | Jun 2020                  | -3.0         | -7.5         | 1.5         | -3.8         | -9.4         | 1.9          | -1.9        | -4.7        | 0.9         |
| OPD                        | Jul 2020                  | -4.6         | -9.1         | -0.1        | -5.8         | -11.5        | -0.1         | -2.9        | -5.8        | -0.1        |
| OPD                        | Aug 2020                  | -3.0         | -7.5         | 1.5         | -3.8         | -9.4         | 1.9          | -1.9        | -4.7        | 0.9         |
| OPD                        | Sep 2020                  | 3.1          | -1.4         | 7.6         | 3.9          | -1.8         | 9.6          | 1.9         | -0.9        | 4.8         |
| OPD                        | Oct 2020                  | -6.0         | -10.5        | -1.5        | -7.6         | -13.4        | -1.9         | -3.8        | -6.7        | -1.0        |
| OPD                        | Nov 2020                  | -2.9         | -7.4         | 1.6         | -3.6         | -9.3         | 2.0          | -1.8        | -4.6        | 1.0         |
| OPD                        | Dec 2020                  | -1.6         | -6.1         | 2.8         | -2.1         | -7.7         | 3.6          | -1.0        | -3.8        | 1.8         |
| <b>OPD</b>                 | <b>Total Covid Period</b> | <b>-3.3</b>  | <b>-5.2</b>  | <b>-1.4</b> | <b>-4.2</b>  | <b>-6.6</b>  | <b>-1.7</b>  | <b>-2.1</b> | <b>-3.3</b> | <b>-0.9</b> |
| IPD                        | Mar 2020                  | -4.6         | -8.8         | -0.3        | -5.8         | -11.2        | -0.4         | -2.9        | -5.5        | -0.2        |
| IPD                        | Apr 2020                  | -19.2        | -23.9        | -14.5       | -24.3        | -30.9        | -17.8        | -12.0       | -15.0       | -9.0        |
| IPD                        | May 2020                  | -28.6        | -33.8        | -23.4       | -36.3        | -44.0        | -28.5        | -17.9       | -21.4       | -14.5       |
| IPD                        | Jun 2020                  | -16.3        | -20.8        | -11.7       | -20.6        | -26.8        | -14.4        | -10.2       | -13.1       | -7.2        |
| IPD                        | Jul 2020                  | -12.5        | -16.9        | -8.1        | -15.9        | -21.8        | -10.0        | -7.8        | -10.6       | -5.0        |
| IPD                        | Aug 2020                  | -11.1        | -15.4        | -6.7        | -14.1        | -19.8        | -8.3         | -6.9        | -9.7        | -4.2        |
| IPD                        | Sep 2020                  | -4.9         | -9.2         | -0.7        | -6.2         | -11.7        | -0.8         | -3.1        | -5.7        | -0.4        |
| IPD                        | Oct 2020                  | -6.7         | -10.9        | -2.4        | -8.4         | -13.9        | -3.0         | -4.2        | -6.8        | -1.5        |
| IPD                        | Nov 2020                  | -4.5         | -8.8         | -0.3        | -5.7         | -11.1        | -0.3         | -2.8        | -5.5        | -0.2        |
| IPD                        | Dec 2020                  | -4.8         | -9.0         | -0.6        | -6.1         | -11.5        | -0.7         | -3.0        | -5.6        | -0.3        |
| <b>IPD</b>                 | <b>Total Covid Period</b> | <b>-11.1</b> | <b>-13.2</b> | <b>-9.0</b> | <b>-14.0</b> | <b>-17.0</b> | <b>-10.9</b> | <b>-7.0</b> | <b>-8.4</b> | <b>-5.6</b> |



|                            |                           | ZAMBIA       |              |              |              |              |              |             |              |             |
|----------------------------|---------------------------|--------------|--------------|--------------|--------------|--------------|--------------|-------------|--------------|-------------|
| Indicator                  | Month/Period              | National     |              |              | Rural        |              |              | Urban       |              |             |
|                            |                           | %change      | Lower bound  | Upper bound  | %change      | Lower bound  | Upper bound  | %change     | Lower bound  | Upper bound |
| ANC1                       | Mar 2020                  | -2.0         | -6.4         | 2.3          | -2.5         | -7.7         | 2.8          | -0.9        | -2.8         | 1.0         |
| ANC1                       | Apr 2020                  | -9.4         | -13.8        | -5.0         | -11.3        | -16.6        | -6.1         | -4.2        | -6.1         | -2.2        |
| ANC1                       | May 2020                  | -21.9        | -26.2        | -17.5        | -26.4        | -31.7        | -21.0        | -9.7        | -11.7        | -7.8        |
| ANC1                       | Jun 2020                  | 6.5          | 2.1          | 10.9         | 7.9          | 2.6          | 13.2         | 2.9         | 1.0          | 4.8         |
| ANC1                       | Jul 2020                  | -8.8         | -13.1        | -4.4         | -10.6        | -15.9        | -5.3         | -3.9        | -5.9         | -2.0        |
| ANC1                       | Aug 2020                  | -6.1         | -10.4        | -1.7         | -7.3         | -12.6        | -2.1         | -2.7        | -4.6         | -0.8        |
| ANC1                       | Sep 2020                  | 2.7          | -1.7         | 7.1          | 3.3          | -2.0         | 8.5          | 1.2         | -0.7         | 3.1         |
| ANC1                       | Oct 2020                  | -10.1        | -14.4        | -5.7         | -12.1        | -17.4        | -6.9         | -4.5        | -6.4         | -2.5        |
| ANC1                       | Nov 2020                  | -1.5         | -5.9         | 2.8          | -1.9         | -7.1         | 3.4          | -0.7        | -2.6         | 1.3         |
| ANC1                       | Dec 2020                  | 3.6          | -0.8         | 8.0          | 4.4          | -0.9         | 9.6          | 1.6         | -0.3         | 3.5         |
| <b>ANC1</b>                | <b>Total Covid Period</b> | <b>-4.7</b>  | <b>-6.5</b>  | <b>-2.8</b>  | <b>-5.6</b>  | <b>-7.9</b>  | <b>-3.4</b>  | <b>-2.1</b> | <b>-2.9</b>  | <b>-1.2</b> |
| ANC4                       | Mar 2020                  | -15.8        | -22.4        | -9.2         | -18.4        | -26.2        | -10.6        | -7.8        | -11.0        | -4.5        |
| ANC4                       | Apr 2020                  | -5.9         | -12.5        | 0.6          | -6.9         | -14.6        | 0.8          | -2.9        | -6.2         | 0.3         |
| ANC4                       | May 2020                  | -22.4        | -29.1        | -15.7        | -26.1        | -34.0        | -18.2        | -11.0       | -14.3        | -7.7        |
| ANC4                       | Jun 2020                  | -13.2        | -19.8        | -6.5         | -15.3        | -23.1        | -7.6         | -6.5        | -9.7         | -3.2        |
| ANC4                       | Jul 2020                  | -15.3        | -21.9        | -8.7         | -17.8        | -25.6        | -10.1        | -7.5        | -10.8        | -4.3        |
| ANC4                       | Aug 2020                  | -26.2        | -32.9        | -19.4        | -30.5        | -38.5        | -22.5        | -12.9       | -16.2        | -9.6        |
| ANC4                       | Sep 2020                  | -17.8        | -24.5        | -11.2        | -20.8        | -28.6        | -13.0        | -8.8        | -12.0        | -5.5        |
| ANC4                       | Oct 2020                  | -22.1        | -28.8        | -15.4        | -25.8        | -33.7        | -17.9        | -10.9       | -14.2        | -7.6        |
| ANC4                       | Nov 2020                  | -20.9        | -27.6        | -14.2        | -24.4        | -32.2        | -16.5        | -10.3       | -13.6        | -7.0        |
| ANC4                       | Dec 2020                  | -21.7        | -28.4        | -15.0        | -25.3        | -33.2        | -17.4        | -10.7       | -14.0        | -7.4        |
| <b>ANC4</b>                | <b>Total Covid Period</b> | <b>-17.5</b> | <b>-20.4</b> | <b>-14.7</b> | <b>-20.3</b> | <b>-23.8</b> | <b>-16.9</b> | <b>-8.8</b> | <b>-10.2</b> | <b>-7.3</b> |
| Deliveries                 | Mar 2020                  | -13.7        | -18.9        | -8.5         | -16.8        | -23.3        | -10.4        | -5.8        | -8.0         | -3.6        |
| Deliveries                 | Apr 2020                  | -16.4        | -21.6        | -11.2        | -20.2        | -26.6        | -13.7        | -7.0        | -9.2         | -4.8        |
| Deliveries                 | May 2020                  | -17.5        | -22.7        | -12.3        | -21.5        | -28.0        | -15.0        | -7.4        | -9.6         | -5.2        |
| Deliveries                 | Jun 2020                  | -16.4        | -21.6        | -11.2        | -20.1        | -26.6        | -13.7        | -7.0        | -9.2         | -4.8        |
| Deliveries                 | Jul 2020                  | -16.0        | -21.2        | -10.8        | -19.7        | -26.1        | -13.2        | -6.8        | -9.0         | -4.6        |
| Deliveries                 | Aug 2020                  | -13.0        | -18.2        | -7.9         | -16.0        | -22.4        | -9.6         | -5.5        | -7.7         | -3.3        |
| Deliveries                 | Sep 2020                  | -14.2        | -19.4        | -9.1         | -17.5        | -23.9        | -11.1        | -6.0        | -8.2         | -3.9        |
| Deliveries                 | Oct 2020                  | -13.8        | -19.0        | -8.6         | -16.9        | -23.4        | -10.5        | -5.9        | -8.0         | -3.7        |
| Deliveries                 | Nov 2020                  | -14.3        | -19.5        | -9.1         | -17.6        | -24.0        | -11.2        | -6.1        | -8.3         | -3.9        |
| Deliveries                 | Dec 2020                  | -11.6        | -16.8        | -6.4         | -14.2        | -20.6        | -7.9         | -4.9        | -7.1         | -2.7        |
| <b>Deliveries</b>          | <b>Total Covid Period</b> | <b>-14.3</b> | <b>-16.5</b> | <b>-12.1</b> | <b>-17.5</b> | <b>-20.3</b> | <b>-14.7</b> | <b>-6.2</b> | <b>-7.1</b>  | <b>-5.2</b> |
| Penta1                     | Mar 2020                  | -5.5         | -10.0        | -0.9         | -6.8         | -12.5        | -1.1         | -2.3        | -4.2         | -0.4        |
| Penta1                     | Apr 2020                  | -5.1         | -9.7         | -0.5         | -6.3         | -12.0        | -0.7         | -2.1        | -4.0         | -0.2        |
| Penta1                     | May 2020                  | -3.0         | -7.6         | 1.6          | -3.7         | -9.4         | 2.0          | -1.2        | -3.1         | 0.7         |
| Penta1                     | Jun 2020                  | 7.0          | 2.4          | 11.6         | 8.7          | 3.0          | 14.4         | 2.9         | 1.0          | 4.8         |
| Penta1                     | Jul 2020                  | -6.0         | -10.5        | -1.4         | -7.4         | -13.1        | -1.7         | -2.5        | -4.4         | -0.6        |
| Penta1                     | Aug 2020                  | -3.0         | -7.6         | 1.6          | -3.7         | -9.4         | 1.9          | -1.3        | -3.1         | 0.6         |
| Penta1                     | Sep 2020                  | 2.7          | -1.9         | 7.3          | 3.3          | -2.4         | 9.0          | 1.1         | -0.8         | 3.0         |
| Penta1                     | Oct 2020                  | 6.4          | 1.8          | 11.0         | 7.9          | 2.2          | 13.6         | 2.6         | 0.7          | 4.5         |
| Penta1                     | Nov 2020                  | 0.9          | -3.6         | 5.5          | 1.2          | -4.5         | 6.8          | 0.4         | -1.5         | 2.3         |
| Penta1                     | Dec 2020                  | -0.4         | -5.0         | 4.2          | -0.5         | -6.2         | 5.2          | -0.2        | -2.1         | 1.7         |
| <b>Penta1</b>              | <b>Total Covid Period</b> | <b>-0.6</b>  | <b>-2.6</b>  | <b>1.4</b>   | <b>-0.7</b>  | <b>-3.2</b>  | <b>1.7</b>   | <b>-0.2</b> | <b>-1.1</b>  | <b>0.6</b>  |
| Penta3                     | Mar 2020                  | -4.9         | -9.4         | -0.3         | -6.0         | -11.7        | -0.4         | -2.0        | -3.9         | -0.1        |
| Penta3                     | Apr 2020                  | -7.0         | -11.5        | -2.4         | -8.6         | -14.3        | -3.0         | -2.9        | -4.8         | -1.0        |
| Penta3                     | May 2020                  | -2.1         | -6.7         | 2.4          | -2.7         | -8.3         | 3.0          | -0.9        | -2.8         | 1.0         |
| Penta3                     | Jun 2020                  | 14.0         | 9.3          | 18.6         | 17.3         | 11.5         | 23.0         | 5.8         | 3.9          | 7.7         |
| Penta3                     | Jul 2020                  | -2.6         | -7.2         | 1.9          | -3.2         | -8.9         | 2.4          | -1.1        | -3.0         | 0.8         |
| Penta3                     | Aug 2020                  | -0.9         | -5.4         | 3.7          | -1.1         | -6.7         | 4.6          | -0.4        | -2.3         | 1.5         |
| Penta3                     | Sep 2020                  | 3.0          | -1.6         | 7.6          | 3.7          | -1.9         | 9.4          | 1.3         | -0.6         | 3.2         |
| Penta3                     | Oct 2020                  | 6.2          | 1.6          | 10.8         | 7.7          | 2.0          | 13.4         | 2.6         | 0.7          | 4.5         |
| Penta3                     | Nov 2020                  | 4.0          | -0.5         | 8.6          | 5.0          | -0.7         | 10.7         | 1.7         | -0.2         | 3.6         |
| Penta3                     | Dec 2020                  | 3.1          | -1.4         | 7.7          | 3.9          | -1.8         | 9.5          | 1.3         | -0.6         | 3.2         |
| <b>Penta3</b>              | <b>Total Covid Period</b> | <b>1.3</b>   | <b>-0.7</b>  | <b>3.3</b>   | <b>1.6</b>   | <b>-0.8</b>  | <b>4.0</b>   | <b>0.5</b>  | <b>-0.3</b>  | <b>1.4</b>  |
| C-section                  | Mar 2020                  | -20.0        | -38.1        | -1.9         | -28.2        | -55.2        | -1.2         | -6.5        | -12.0        | -0.9        |
| C-section                  | Apr 2020                  | -23.1        | -41.5        | -4.7         | -32.6        | -60.5        | -4.7         | -7.4        | -13.0        | -1.8        |
| C-section                  | May 2020                  | -22.0        | -40.3        | -3.7         | -31.0        | -58.6        | -3.5         | -7.1        | -12.7        | -1.5        |
| C-section                  | Jun 2020                  | -16.8        | -34.6        | 1.0          | -23.7        | -49.8        | 2.5          | -5.4        | -10.9        | 0.1         |
| C-section                  | Jul 2020                  | -19.6        | -37.7        | -1.6         | -27.7        | -54.6        | -0.8         | -6.3        | -11.9        | -0.8        |
| C-section                  | Aug 2020                  | -23.0        | -41.4        | -4.6         | -32.4        | -60.2        | -4.5         | -7.4        | -13.0        | -1.8        |
| C-section                  | Sep 2020                  | -20.4        | -38.5        | -2.2         | -28.7        | -55.8        | -1.6         | -6.6        | -12.1        | -1.0        |
| C-section                  | Oct 2020                  | -18.5        | -36.4        | -0.5         | -26.0        | -52.6        | 0.6          | -5.9        | -11.5        | -0.4        |
| C-section                  | Nov 2020                  | -27.4        | -46.4        | -8.4         | -38.6        | -67.9        | -9.3         | -8.8        | -14.5        | -3.2        |
| C-section                  | Dec 2020                  | -18.6        | -36.6        | -0.7         | -26.3        | -52.9        | 0.3          | -6.0        | -11.6        | -0.4        |
| <b>C-section</b>           | <b>Total Covid Period</b> | <b>-20.2</b> | <b>-29.2</b> | <b>-11.1</b> | <b>-28.0</b> | <b>-43.0</b> | <b>-13.0</b> | <b>-6.7</b> | <b>-9.2</b>  | <b>-4.2</b> |
| Measles vaccination        | Mar 2020                  | -12.5        | -18.2        | -6.8         | -15.8        | -23.1        | -8.6         | -4.9        | -7.1         | -2.6        |
| Measles vaccination        | Apr 2020                  | -13.6        | -19.3        | -7.9         | -17.3        | -24.6        | -10.0        | -5.3        | -7.6         | -3.1        |
| Measles vaccination        | May 2020                  | -7.3         | -13.0        | -1.6         | -9.3         | -16.6        | -2.1         | -2.9        | -5.1         | -0.6        |
| Measles vaccination        | Jun 2020                  | 1.7          | -4.0         | 7.5          | 2.2          | -5.1         | 9.5          | 0.7         | -1.6         | 2.9         |
| Measles vaccination        | Jul 2020                  | -16.5        | -22.2        | -10.7        | -20.9        | -28.2        | -13.6        | -6.5        | -8.7         | -4.2        |
| Measles vaccination        | Aug 2020                  | -2.4         | -8.1         | 3.3          | -3.0         | -10.3        | 4.3          | -0.9        | -3.2         | 1.3         |
| Measles vaccination        | Sep 2020                  | -5.3         | -11.0        | 0.4          | -6.7         | -13.9        | 0.6          | -2.1        | -4.3         | 0.2         |
| Measles vaccination        | Oct 2020                  | 4.7          | -1.0         | 10.5         | 6.0          | -1.3         | 13.3         | 1.9         | -0.4         | 4.1         |
| Measles vaccination        | Nov 2020                  | 5.5          | -0.3         | 11.2         | 7.0          | -0.4         | 14.3         | 2.1         | -0.1         | 4.4         |
| Measles vaccination        | Dec 2020                  | -9.1         | -14.8        | -3.4         | -11.6        | -18.9        | -4.3         | -3.6        | -5.8         | -1.3        |
| <b>Measles vaccination</b> | <b>Total Covid Period</b> | <b>-5.4</b>  | <b>-7.8</b>  | <b>-3.0</b>  | <b>-6.9</b>  | <b>-9.9</b>  | <b>-3.8</b>  | <b>-2.1</b> | <b>-3.1</b>  | <b>-1.2</b> |
| OPD                        | Mar 2020                  | 10.7         | 5.0          | 16.4         | 13.3         | 6.1          | 20.5         | 4.4         | 2.0          | 6.7         |
| OPD                        | Apr 2020                  | 5.0          | -0.7         | 10.6         | 6.2          | -0.8         | 13.2         | 2.0         | -0.3         | 4.4         |
| OPD                        | May 2020                  | -7.5         | -13.1        | -1.8         | -9.3         | -16.3        | -2.2         | -3.1        | -5.4         | -0.7        |
| OPD                        | Jun 2020                  | -10.0        | -15.6        | -4.3         | -12.4        | -19.5        | -5.3         | -4.1        | -6.4         | -1.8        |
| OPD                        | Jul 2020                  | -11.9        | -17.6        | -6.2         | -14.8        | -21.9        | -7.7         | -4.9        | -7.2         | -2.6        |
| OPD                        | Aug 2020                  | -14.9        | -20.6        | -9.2         | -18.5        | -25.8        | -11.3        | -6.1        | -8.5         | -3.8        |
| OPD                        | Sep 2020                  | -3.6         | -9.2         | 2.0          | -4.5         | -11.5        | 2.5          | -1.5        | -3.8         | 0.8         |
| OPD                        | Oct 2020                  | 1.4          | -4.2         | 7.0          | 1.7          | -5.3         | 8.7          | 0.6         | -1.7         | 2.9         |
| OPD                        | Nov 2020                  | 6.9          | 1.2          | 12.5         | 8.5          | 1.5          | 15.6         | 2.8         | 0.5          | 5.1         |
| OPD                        | Dec 2020                  | 9.0          | 3.3          | 14.7         | 11.2         | 4.1          | 18.3         | 3.7         | 1.4          | 6.0         |
| <b>OPD</b>                 | <b>Total Covid Period</b> | <b>-1.5</b>  | <b>-3.9</b>  | <b>0.9</b>   | <b>-1.9</b>  | <b>-4.9</b>  | <b>1.1</b>   | <b>-0.6</b> | <b>-1.6</b>  | <b>0.4</b>  |

**% CHANGE IN HOSPITAL ADMISSION OVER MARCH-DECEMBER  
2020 BY FIRST LEVEL SUBNATIONAL AREA**

| Country and region   | Indicator | %change | Lower bound | Upper bound |
|----------------------|-----------|---------|-------------|-------------|
| <b>BURKINA FASO</b>  |           |         |             |             |
| Boucle du Mouhoun    | ipd       | 2.7     | -3.8        | 9.2         |
| Cascades             | ipd       | 1.7     | -2.4        | 5.8         |
| Centre               | ipd       | 1.0     | -1.3        | 3.2         |
| Centre Est           | ipd       | 3.0     | -4.2        | 10.2        |
| Centre Nord          | ipd       | 3.9     | -5.9        | 13.8        |
| Centre Ouest         | ipd       | 3.3     | -4.7        | 11.2        |
| Centre Sud           | ipd       | 5.4     | -9.9        | 20.7        |
| Est                  | ipd       | 2.1     | -2.9        | 7.1         |
| Hauts Bassins        | ipd       | 2.7     | -3.8        | 9.3         |
| Nord                 | ipd       | 2.8     | -4.0        | 9.6         |
| Plateau central      | ipd       | 2.5     | -3.7        | 8.8         |
| Sahel                | ipd       | 2.0     | -2.7        | 6.7         |
| Sud Ouest            | ipd       | 2.4     | -3.3        | 8.1         |
| <b>COTE D'IVOIRE</b> |           |         |             |             |
| Abidjan 1            | ipd       | -1.5    | -4.1        | 1.1         |
| Abidjan 2            | ipd       | -3.8    | -11.9       | 4.3         |
| Agneby-Tiassa        | ipd       | -2.2    | -6.5        | 2.0         |
| Bafing               | ipd       | -8.6    | -46.1       | 28.9        |
| Bagoue               | ipd       | -11.3   | -72.9       | 50.3        |
| Belier               | ipd       | -2.6    | -7.4        | 2.3         |
| Bere                 | ipd       | -11.8   | -80.3       | 56.6        |
| Bounkani             | ipd       | -13.4   | -88.7       | 61.9        |
| Cavally              | ipd       | -4.3    | -14.2       | 5.7         |
| Folon                | ipd       | -31.5   | -597.6      | 534.7       |
| Gbeke                | ipd       | -16.6   | -110.1      | 76.8        |
| Gbokle               | ipd       | -3.5    | -12.3       | 5.3         |
| Gontougo             | ipd       | -3.9    | -12.4       | 4.6         |
| Grands Ponts         | ipd       | -2.2    | -6.3        | 2.0         |
| Guemon               | ipd       | -2.3    | -6.7        | 2.1         |
| Gôh                  | ipd       | -1.7    | -4.9        | 1.4         |
| Hambol               | ipd       | -2.2    | -6.3        | 1.9         |
| Hautassandra         | ipd       | -0.9    | -2.4        | 0.6         |
| Iffou                | ipd       | -3.2    | -10.3       | 3.8         |
| Indenie-Duablin      | ipd       | -2.8    | -8.5        | 2.9         |
| Kabadougou           | ipd       | -3.5    | -12.5       | 5.5         |
| Lôh-Djiboua          | ipd       | -1.9    | -5.3        | 1.5         |
| Marahoue             | ipd       | -2.7    | -8.1        | 2.7         |
| Me                   | ipd       | -3.7    | -11.6       | 4.3         |
| Moronou              | ipd       | -3.4    | -11.0       | 4.3         |
| N'zi                 | ipd       | -3.6    | -11.9       | 4.7         |
| Nawa                 | ipd       | -3.5    | -10.8       | 3.9         |
| Poro                 | ipd       | -2.4    | -6.8        | 2.0         |
| San Pedro            | ipd       | -1.3    | -3.6        | 1.0         |
| Sud-Comoe            | ipd       | -2.3    | -6.7        | 2.0         |
| Tchologo             | ipd       | -4.5    | -16.5       | 7.5         |
| Tonkpi               | ipd       | -2.8    | -8.4        | 2.7         |
| Worodougou           | ipd       | -5.0    | -26.2       | 16.2        |

**% CHANGE IN HOSPITAL ADMISSION OVER MARCH-DECEMBER  
2020 BY FIRST LEVEL SUBNATIONAL AREA**

| Country and region | Indicator | %change | Lower bound | Upper bound |
|--------------------|-----------|---------|-------------|-------------|
| <b>GHANA</b>       |           |         |             |             |
| Ahafo              | ipd       | -20.2   | -39.1       | -1.3        |
| Ashanti            | ipd       | -14.5   | -18.5       | -10.6       |
| Bono               | ipd       | -13.8   | -20.3       | -7.4        |
| Bono East          | ipd       | -15.3   | -23.5       | -7.1        |
| Central            | ipd       | -17.8   | -25.9       | -9.8        |
| Eastern            | ipd       | -20.7   | -29.7       | -11.7       |
| Greater Accra      | ipd       | -22.2   | -33.0       | -11.5       |
| North East         | ipd       | -21.4   | -42.7       | -0.1        |
| Northern           | ipd       | -13.3   | -18.4       | -8.1        |
| Oti                | ipd       | -23.7   | -46.3       | -1.1        |
| Savannah           | ipd       | -33.1   | -80.1       | 13.9        |
| Upper East         | ipd       | -18.1   | -27.8       | -8.3        |
| Upper West         | ipd       | -14.9   | -22.7       | -7.2        |
| Volta              | ipd       | -16.3   | -23.6       | -9.0        |
| Western            | ipd       | -13.0   | -18.4       | -7.7        |
| Western North      | ipd       | -19.8   | -34.8       | -4.8        |
| <b>KENYA</b>       |           |         |             |             |
| Baringo            | ipd       | -41.4   | -54.1       | -28.7       |
| Bomet              | ipd       | -49.9   | -67.8       | -31.9       |
| Bungoma            | ipd       | -10.9   | -12.6       | -9.2        |
| Busia              | ipd       | -21.5   | -25.7       | -17.3       |
| Elgeyo Marakwet    | ipd       | -49.7   | -67.6       | -31.9       |
| Embu               | ipd       | -44.2   | -58.5       | -29.8       |
| Garissa            | ipd       | -46.1   | -62.3       | -29.8       |
| Homa Bay           | ipd       | -25.1   | -30.4       | -19.7       |
| Isiolo             | ipd       | -95.1   | -157.6      | -32.7       |
| Kajiado            | ipd       | -27.2   | -33.4       | -21.0       |
| Kakamega           | ipd       | -10.8   | -12.5       | -9.2        |
| Kericho            | ipd       | -18.1   | -21.4       | -14.8       |
| Kiambu             | ipd       | -8.7    | -10.0       | -7.4        |
| Kilifi             | ipd       | -22.8   | -27.4       | -18.1       |
| Kirinyaga          | ipd       | -20.5   | -24.4       | -16.6       |
| Kisii              | ipd       | -15.2   | -17.8       | -12.7       |
| Kisumu             | ipd       | -10.7   | -12.4       | -9.1        |
| Kitui              | ipd       | -26.9   | -32.9       | -20.8       |
| Kwale              | ipd       | -49.7   | -67.6       | -31.9       |
| Laikipia           | ipd       | -71.1   | -106.4      | -35.8       |
| Lamu               | ipd       | -124.2  | -229.6      | -18.8       |
| Machakos           | ipd       | -18.1   | -21.4       | -14.8       |
| Makueni            | ipd       | -33.0   | -41.7       | -24.4       |
| Mandera            | ipd       | -144.2  | -290.3      | 1.9         |
| Marsabit           | ipd       | -87.6   | -140.9      | -34.3       |
| Meru               | ipd       | -16.2   | -19.0       | -13.4       |
| Migori             | ipd       | -16.6   | -19.5       | -13.7       |
| Mombasa            | ipd       | -14.7   | -17.2       | -12.3       |
| Muranga            | ipd       | -34.3   | -43.3       | -25.2       |
| Nairobi            | ipd       | -5.4    | -6.2        | -4.6        |
| Nakuru             | ipd       | -9.7    | -11.1       | -8.2        |
| Nandi              | ipd       | -35.2   | -44.7       | -25.7       |
| Narok              | ipd       | -41.9   | -55.0       | -28.9       |
| Nyamira            | ipd       | -80.6   | -125.6      | -35.5       |
| Nyandarua          | ipd       | -51.1   | -69.8       | -32.3       |
| Nyeri              | ipd       | -21.5   | -25.7       | -17.3       |
| Samburu            | ipd       | -103.3  | -176.5      | -30.1       |
| Siaya              | ipd       | -23.8   | -28.7       | -18.8       |
| Taita Taveta       | ipd       | -80.3   | -125.0      | -35.6       |
| Tana River         | ipd       | -224.9  | -568.9      | 119.0       |
| Tharaka Nithi      | ipd       | -53.6   | -74.1       | -33.1       |
| Trans Nzoia        | ipd       | -32.2   | -40.3       | -24.0       |
| Turkana            | ipd       | -50.8   | -69.5       | -32.2       |
| Uasin Gishu        | ipd       | -52.0   | -71.4       | -32.6       |
| Vihiga             | ipd       | -34.4   | -43.5       | -25.2       |
| Wajir              | ipd       | -98.4   | -165.0      | -31.9       |
| West Pokot         | ipd       | -43.5   | -57.4       | -29.6       |



**% CHANGE IN HOSPITAL ADMISSION OVER MARCH-DECEMBER  
2020 BY FIRST LEVEL SUBNATIONAL AREA**

| Country and region | Indicator | %change | Lower bound | Upper bound |
|--------------------|-----------|---------|-------------|-------------|
| <b>MALI</b>        |           |         |             |             |
| Bamako             | ipd       | -7.7    | -17.7       | 2.3         |
| Gao                | ipd       | -9.4    | -22.5       | 3.7         |
| Kayes              | ipd       | -8.9    | -20.5       | 2.6         |
| Kidal              | ipd       | -10.7   | -25.4       | 4.1         |
| Koulikoro          | ipd       | -5.4    | -12.2       | 1.5         |
| Menaka             | ipd       | -10.0   | -24.2       | 4.3         |
| Mopti              | ipd       | -8.4    | -19.2       | 2.5         |
| Segou              | ipd       | -8.4    | -19.3       | 2.5         |
| Sikasso            | ipd       | -10.1   | -23.2       | 3.1         |
| Taoudenit          | ipd       | -12.4   | -29.3       | 4.6         |
| Tombouctou         | ipd       | -6.2    | -14.3       | 1.8         |
| <b>NIGER</b>       |           |         |             |             |
| Agadez             | ipd       | -31.7   | -88.9       | 25.6        |
| Diffa              | ipd       | -40.8   | -140.0      | 58.4        |
| Dosso              | ipd       | -16.6   | -33.8       | 0.5         |
| Maradi             | ipd       | -30.4   | -77.2       | 16.5        |
| Niamey             | ipd       | -7.7    | -13.8       | -1.5        |
| Tahoua             | ipd       | -25.2   | -54.2       | 3.9         |
| Tillaberi          | ipd       | -43.2   | -120.2      | 33.8        |
| Zinder             | ipd       | -21.9   | -46.3       | 2.5         |
| <b>TANZANIA</b>    |           |         |             |             |
| Arusha             | ipd       | -10.4   | -15.6       | -5.1        |
| Dar Es Salaam      | ipd       | -3.9    | -5.0        | -2.9        |
| Dodoma             | ipd       | -11.2   | -16.9       | -5.5        |
| Geita              | ipd       | -17.9   | -34.3       | -1.6        |
| Iringa             | ipd       | -13.9   | -24.6       | -3.1        |
| Kagera             | ipd       | -6.5    | -8.6        | -4.4        |
| Katavi             | ipd       | -30.1   | -80.0       | 19.7        |
| Kigoma             | ipd       | -8.6    | -12.0       | -5.1        |
| Kilimanjaro        | ipd       | -8.8    | -12.6       | -5.0        |
| Lindi              | ipd       | -14.4   | -25.0       | -3.8        |
| Manyara            | ipd       | -12.7   | -20.4       | -5.0        |
| Mara               | ipd       | -11.2   | -16.6       | -5.8        |
| Mbeya              | ipd       | -10.5   | -15.9       | -5.1        |
| Morogoro           | ipd       | -9.4    | -13.2       | -5.5        |
| Mtwara             | ipd       | -16.4   | -27.6       | -5.1        |
| Mwanza             | ipd       | -10.4   | -15.3       | -5.4        |
| Njombe             | ipd       | -11.1   | -17.5       | -4.7        |
| Pwani              | ipd       | -18.4   | -32.4       | -4.3        |
| Rukwa              | ipd       | -13.0   | -23.6       | -2.5        |
| Ruvuma             | ipd       | -8.2    | -11.3       | -5.0        |
| Shinyanga          | ipd       | -11.9   | -19.3       | -4.6        |
| Simiyu             | ipd       | -22.3   | -47.5       | 2.8         |
| Singida            | ipd       | -13.5   | -22.1       | -4.8        |
| Songwe             | ipd       | -17.3   | -34.0       | -0.7        |
| Tabora             | ipd       | -12.6   | -19.7       | -5.5        |
| Tanga              | ipd       | -12.9   | -19.3       | -6.4        |
| <b>UGANDA</b>      |           |         |             |             |
| Central            | ipd       | -13.4   | -17.9       | -8.9        |
| Eastern            | ipd       | -21.5   | -31.0       | -12.0       |
| Northern           | ipd       | -20.5   | -29.0       | -12.0       |
| Western            | ipd       | -17.3   | -23.6       | -10.9       |
